1 **SMAD4 governs a feedforward regulation of the TGF- $\beta$ -effects in CD8 T cells that**  
2 **contributes to preventing chronic intestinal inflammation**

3 Ramdane Igalouzene<sup>1,2</sup>, Hector Hernandez-Vargas<sup>1</sup>, Nicolas Benech<sup>1,2</sup>, David Bauché<sup>1,2</sup>,  
4 Célia Barrachina<sup>3</sup>, Emeric Dubois, Julien C. Marie<sup>1,2\*</sup> and Saïdi M'Homa Soudja<sup>1,2,4\*</sup>

5 1: Lyon Cancer Research Center (CRCL), INSERM 1052 CNRS 5286, Centre Léon  
6 Bérard (CLB), Lyon, France.

7 2: University of Lyon-France.

8 3: Montpellier GenomiX, Univ. Montpellier, CNRS, INSERM, Montpellier France

9 4: Lead contact: [saidi.soudja@inserm.fr](mailto:saidi.soudja@inserm.fr) \* Co-corresponding Authors

10 **Abstract**

11 SMAD4, a key mediator of TGF- $\beta$  signaling, plays a crucial role in T cells to prevent  
12 chronic gut inflammation. However, the molecular mechanisms underlying this control  
13 remain elusive. Using different genetic and epigenetic approaches, we unexpectedly  
14 reveal that SMAD4 in CD8 T cells prevents chronic intestinal inflammation by a  
15 feedforward mechanism that is TGF- $\beta$ -independent. Prior to any TGF- $\beta$ -receptor  
16 engagement, SMAD4 acts as an active and basal repressor of epigenetic, transcriptional  
17 and functional TGF- $\beta$  imprinting in CD8 T cells. Thus, in sharp opposition to total TGF- $\beta$   
18 signaling deletion, SMAD4 deletion impairs naïve CD8 T cell effector predisposition but  
19 promotes CD8 T cell accumulation and epithelial retention by promoting their response to  
20 IL-7 and their expression of integrins such as *Itgae*. Besides, SMAD4 deletion unleashes  
21 the induction of a wide range of TGF- $\beta$ -signaling-repressors such as *Smad7*, *Skj*, *Skil*,  
22 and *Smurf2* and hampers TGF- $\beta$ -mediated CD8 T cell immunosuppression.  
23 Mechanistically, prior to any TGF- $\beta$  signal, SMAD4 binds to the loci of several TGF- $\beta$ -  
24 target genes, and by regulating histone acetylation, represses their expression. The  
25 massive gut epithelial colonization, associated with their escape from the  
26 immunoregulatory TGF- $\beta$  effects overtakes their poor effector preconditioning and elicits  
27 microbiota-driven chronic epithelial CD8 T cell activation. Hence, in an anticipatory  
28 manner, independently of TGF- $\beta$ , SMAD4 governs a feedforward regulation of TGF- $\beta$   
29 effects in CD8 T cells, preventing chronic intestinal inflammation.

30

## 31 **Introduction**

32 An excessive immune reaction against microbiota is widely regarded as a common  
33 feature of inflammatory bowel diseases (IBDs) <sup>1,2</sup>. Several immune-regulatory  
34 mechanisms prevent this reaction in the gastrointestinal tract, including the presence of  
35 the transforming growth factor beta (TGF- $\beta$ ) cytokine. This highly conserved cytokine is  
36 abundantly produced in the mammalian gut, <sup>3</sup> and is strongly implicated in immune cell  
37 regulation, and particularly T lymphocyte regulation by repressing numerous effector T  
38 cell functions <sup>4-6</sup> and promoting regulatory T cell-development, stability and function <sup>7</sup>.

39 The active form of TGF- $\beta$  binds to TGF- $\beta$ RII leading to its auto-phosphorylation,  
40 which in turn phosphorylates TGF- $\beta$ RI through its kinase domain. TGF- $\beta$ RI then induces  
41 the phosphorylation of SMAD2 and SMAD3, which subsequently interact with either  
42 SMAD4 or tripartite motif-containing 33 (TRIM33). These complexes translocate to the  
43 nucleus and regulate the expression of several gene sets depending on the cellular and  
44 molecular context, including a wide range of TGF- $\beta$ -repressor genes such as *Smad7* and  
45 *Ski*, thus generating a negative feedback loop to finely control TGF- $\beta$  signaling <sup>8-10</sup>. In  
46 addition, other non-canonical signaling pathways have been described downstream of  
47 TGF- $\beta$ R engagement, namely MAPK/MEK, JNK/p38 and AKT/PI3K <sup>11</sup>.

48 The signaling pathways activated by TGF- $\beta$  can work either in concert or in  
49 opposition depending on the context, hampering their deciphering. For instance, during  
50 hematopoiesis each pathway regulates distinct and selective sets of genes in response to  
51 TGF- $\beta$ , thus regulating different steps of hematopoiesis <sup>12</sup>. Aside from this complementary  
52 interplay, TGF- $\beta$ -activated pathways can also compete and inhibit each other. For  
53 instance, TRIM33 can compete with SMAD4 to interact with SMAD2 and SMAD3, and in  
54 addition, can induce SMAD4 degradation through its E3 ubiquitin ligase function <sup>13-15</sup>.  
55 Given this intricate interplay, ablating one branch of TGF- $\beta$  signaling may functionally  
56 impact the others, depending on the context.

57 TGF- $\beta$  signaling is altered in IBD and CRC patients <sup>16</sup>. Indeed, even though the gut  
58 mucosa of those patients displays a high level of TGF- $\beta$  <sup>17</sup>, their intestinal T cells are

59 poorly responsive to this anti-inflammatory cytokine owing to the overexpression of the  
60 TGF- $\beta$  repressor, SMAD7. In addition, patients harboring SMAD4 germline mutations  
61 develop intestinal polyps and are more predisposed to develop CRCs<sup>18</sup>. This has further  
62 been demonstrated using genetic mouse models, in which SMAD4 deficiency in T cells  
63 drove chronic inflammation and cancer, highlighting a crucial role for SMAD4 in T cells in  
64 preventing IBDs<sup>19–21</sup>. However, the precise cellular and molecular mechanisms governed  
65 by SMAD4 in directing this protective role remain undetermined.

66 Here, we reveal that SMAD4, in an anticipatory manner, independently of TGF- $\beta$ ,  
67 orchestrates a feedforward control of TGF- $\beta$ -effects in CD8 T cells that is crucial in  
68 preventing IBDs. Consequently, SMAD4 ablation endows CD8 T cells with a strong  
69 epigenetic, -transcriptional and -functional TGF- $\beta$  signature. This TGF- $\beta$ -independent  
70 SMAD4 function restricts the accumulation and the intestinal epithelial retention of CD8 T  
71 cells. Besides, we uncover that SMAD4, before any TGF- $\beta$ R-engagement, directly inhibits  
72 TGF- $\beta$  negative feedback loop mediator expression. Thus, by reducing the basal TGF- $\beta$   
73 target gene and TGF- $\beta$  repressor expression, SMAD4 potentiates to TGF- $\beta$ -effect.  
74 Mechanistically, prior to any TGF- $\beta$  signaling, SMAD4 acts at the chromatin level and  
75 regulates numerous TGF- $\beta$  target genes by epigenetic modifications inversely to TGF- $\beta$   
76 signaling. Altogether, our findings unveil an original SMAD4 feedforward regulation in  
77 CD8 T cells that predisposes CD8 T cell to TGF- $\beta$ -effects and contributes grandly to  
78 maintain intestinal homeostasis.

79

80

## 81 **Results**

### 82 **SMAD4 in T cells protects mice from IBDs in a TGF- $\beta$ -independent manner**

83 Given the intricate interplay between TGF- $\beta$  pathways, we first investigated the  
84 impact of the other TGF- $\beta$  branches in the gut inflammation described in mice lacking  
85 SMAD4 in T lymphocytes. To this end, we used the CD4-CRE conditional deletion system  
86 to establish several mouse strains lacking one or several TGF- $\beta$  signaling branches. We

87 established mice with a deletion of SMAD4 (SKO), TRIM33 (TKO), double deletion of  
88 TRIM33 and SMAD4 (STKO) or double deletion of TGF- $\beta$ RII and SMAD4 (R2SKO) in T  
89 cells (**Fig. 1a, Supplementary information, Fig. 1a**). Consistent with previous studies,  
90 TKO, SKO, STKO and R2SKO mice did not display any signs of autoimmunity even at a  
91 more advanced age<sup>22–24</sup>. However, strikingly, the weight of all mice lacking SMAD4 in T  
92 cells (SKO, STKO and R2SKO) stopped increasing from 4 months of age onwards (**Fig.**  
93 **1b**). Postmortem analysis revealed an important intestinal inflammation in these animals,  
94 illustrated by an enlargement of the duodenum and a shortening of the colon (**Fig. 1c-d**).  
95 Histological analysis revealed massive immune cell infiltrations in the mucosa and  
96 submucosa in both the small intestine and the colon of these mice compared to WT and  
97 TKO mice. Additionally, evident hyperplasia, crypt abscesses and strong intestinal crypt  
98 inflammation, likely cryptitis, were detected in all mice lacking SMAD4 in T cells, indicative  
99 of a strong chronic inflammation in these animals (**Fig. 1e, Supplementary information,**  
100 **Fig.2b**). Collectively, our data genetically demonstrate that the ablation of the remaining  
101 TGF- $\beta$  pathways in SKO mice does not prevent mice from developing chronic intestinal  
102 inflammation.

103 Then, given that SMAD4 is known to mediate key biological functions  
104 independently of TGF- $\beta$  signaling in T cells<sup>22,25</sup>, we assessed whether a TGF- $\beta$ -  
105 independent SMAD4 function in T cells could contribute to maintain intestinal  
106 homeostasis. Given that TGF- $\beta$ RII-deficient (R2KO) mice die within 3-4 weeks<sup>5,6</sup> and  
107 intestinal inflammation only develops at 5 months in SMAD4-deficient mice, we employed  
108 a bone marrow (BM)-engrafted mouse model to compare age-matched adult mice. We  
109 engrafted irradiated adult mice with BM from WT, R2KO, SKO, and R2SKO mice. Mice  
110 engrafted with R2KO, SKO, and R2SKO BM cells lose weight compared to WT engrafted  
111 ones (**Fig. 1f**). However, mice engrafted with BM cells from SKO and R2SKO mice  
112 developed more severe gut inflammation compared to those engrafted with R2KO BM  
113 cells, as evidenced by shorter colons, massive immune cell infiltrations, hyperplasia and  
114 important mucosal damage (**Fig. 1g-i, Supplementary information, Fig.1c**). Hence,  
115 these observations demonstrate that SMAD4 in T cells, in a TGF- $\beta$  independent manner,  
116 contributes to maintain intestinal homeostasis.

117 **CD8 $\alpha\beta$  T cells are key effector cells that contribute to the intestinal**  
118 **immunopathology observed in SMAD4 deficient mice**

119 Next, we examined which effector T cell population mediates this intestinal  
120 immunopathology by using specific anti-CD4 and anti-CD8 $\beta$  depleting antibodies. To  
121 avoid undesirable long-term side effects of depleting antibody treatment, we used the BM-  
122 engrafted mouse models (**Fig. 2a**). Flow cytometry analysis confirmed the effective  
123 ablation of conventional CD8 $\alpha\beta$  and CD4 T cells in secondary lymphoid organs (SLOs)  
124 and in the gut without depleting the other populations, such as CD8 $\alpha\alpha$  TCR $\alpha\beta$  and  
125 TCR $\gamma\delta$  populations (**Supplementary information, Fig. 2a-b**). Remarkably, BM SKO-  
126 engrafted mice treated with anti-CD8 $\beta$  did not exhibit weight loss and colon length  
127 reduction, in sharp contrast to anti-CD4 treated mice (**Fig. 2b-c**). Furthermore, histological  
128 examination showed a substantial decrease in immune cell infiltration and absence of  
129 hyperplasia and crypt abscesses in BM SKO-engrafted mice treated with anti-CD8 $\beta$  (**Fig.**  
130 **2d**). Similarly, anti-CD8 $\beta$  treatment rescued BM R2SKO-engrafted mice from developing  
131 intestinal inflammation (**Supplementary information, Fig. 2c-d**). Collectively, these  
132 results suggest a key effector role of CD8 $\alpha\beta$  T cell in contributing to the intestinal damage  
133 in SMAD4 deficient mice.

134  
135 **SMAD4 prevents microbiota-driven accumulation and activation of CD8 $\alpha\beta$  T cells**  
136 **within the gut-epithelium**

137 We then assessed the mechanism by which SMAD4 in CD8 $\alpha\beta$  T cells prevents  
138 intestinal immunopathology. Strikingly, we observed in all SMAD4-deficient mice (SKO,  
139 STKO and R2SKO) a substantial increase in the frequency and numbers of CD8 $\alpha\beta$  T cells  
140 in secondary lymphoid organs, as well as in the lungs, skin, colon, and small intestine,  
141 compared to WT or TKO mice (**Fig. 3a-b, Supplementary information, Fig. 3a-b**). This  
142 data revealed a systemic accumulation of CD8 $\alpha\beta$  T cells in the absence of SMAD4.  
143 Besides this important accumulation, CD8 $\alpha\beta$  T cells from SKO, STKO and R2SKO mice,  
144 expressed large amounts of cytotoxic molecules including granzymes A and B (GZMA  
145 and GZMB) or pro-inflammatory cytokines and chemokines such as IFN- $\gamma$ , TNF $\alpha$  and

146 CCL3 in the intestinal epithelium compared to WT and TKO mice (**Fig. 3c**,  
147 **Supplementary information, Fig. 3c-d**). Importantly, the strong co-expression of the  
148 epithelial retention marker CD103 and GZMB, suggests that the activated CD8 $\alpha\beta$  T cells  
149 were likely *bona fide* intra-epithelial lymphocytes (IELs) (**Supplementary information**,  
150 **Fig. 3e**). Remarkably, CD8 $\alpha\beta$  T cells from SMAD4-deficient mice were barely or not  
151 activated in the spleen, the lung, skin, lymph nodes, and *lamina propria* of the intestine  
152 (**Fig. 3c, Supplementary information, Fig. 3f-g**). This indicated a spatial-restricted-  
153 activation of SMAD4-deficient CD8 T cells within the intestine epithelium.

154 Next, we investigated the mechanisms triggering intestinal epithelial activation of  
155 CD8 $\alpha\beta$  T cells in SMAD4-deficient mice. Given the importance of the microbiota in  
156 shaping intestinal immunity and promoting IBDs<sup>1,2</sup>, we hypothesized that commensal  
157 bacteria could be responsible for CD8 $\alpha\beta$  T cell intestinal epithelial accumulation and  
158 exacerbated epithelial activation. In order to confirm this scenario, SKO mice were treated  
159 with antibiotics (ATB). Strikingly, ATB treatment of SKO mice completely abrogated  
160 CD8 $\alpha\beta$  T cell accumulation in the gut epithelium (**Fig. 3d**). In addition, the enhanced  
161 production of IFN- $\gamma$  and granzymes in CD8 $\alpha\beta$  IELs was also abolished in ATB-treated  
162 SKO mice (**Fig. 3e**). Hence, these data reveal that the TGF- $\beta$ -independent SMAD4  
163 function prevents the spontaneous microbiota-driven activation of CD8 $\alpha\beta$  T cells within  
164 the epithelial layer of the intestine.

165 **In the absence of TGF- $\beta$ , SMAD4 restrains the TGF- $\beta$ -transcriptional signature in**  
166 **CD8 T cells and preconditions effector differentiation of naïve CD8 T cells**

167  
168 To go deeper in the molecular processes governing SMAD4-mediated control of  
169 intestinal homeostasis in CD8 T cells, we next performed a global gene expression profile  
170 of CD8 T cells from WT, SKO and R2KO mice. In order to rule out any potential side  
171 effects of the inflammatory environment, we used F5 TCR transgenic CD8 T cells in a  
172 RAG2KO background, since these mice did not develop any inflammation  
173 (**Supplementary information, Fig. 4a**). Unexpectedly, the comparison between SKO  
174 CD8 T cells and R2KO CD8 T cells resulted in a larger set of significantly differentially

175 expressed genes (DEGs) (1573 genes) (FDR < 0.05) than the comparison between SKO  
176 and WT mice (408 DEGs) (**Fig. 4a**), highlighting a wider molecular gap between SKO and  
177 R2KO naïve CD8 T cells. An unsupervised hierarchical clustering of all DEGs revealed  
178 five distinct clusters. Strikingly, DEGs in which the SMAD4 deletion and the TGF- $\beta$ RII  
179 deletion show a distinct expression pattern (clusters II, III and V) represent more than 92  
180 % of all DEGs, definitively, indicating a wide transcriptional disparity between SKO and  
181 R2KO CD8 T cells. (**Fig. 4b, Supplementary information, Fig. 4b**). More importantly,  
182 the large majority of the divergent DEGs are genes where SMAD4 deletion affects  
183 negatively (cluster II) or positively (cluster III) their expression compared to WT and  
184 oppositely to TGF- $\beta$  signaling depletion (**Fig. 4b-c**). Thus, this wide transcriptional  
185 disparity is largely attributed to an evident opposition between SMAD4 and TGF- $\beta$   
186 signaling and reveals that SMAD4 acts as a repressor of TGF- $\beta$  transcriptional outcome  
187 in CD8 T cells. To assess whether this marked transcriptional opposition orchestrated by  
188 SMAD4 is not mediated by a TGF- $\beta$  signal, we then conducted a genome-wide RNA  
189 sequencing in R2SKO CD8 T cells and compared the gene expression profiles of CD8 T  
190 cells from F5 R2SKO with F5 SKO or F5 R2KO mice. This analysis unveiled a larger set  
191 of DEGs (740 genes) in the comparison between R2SKO and R2KO CD8 T cells by  
192 contrast to the comparison between SKO and R2SKO CD8 T cells (106 DEGs) (**Fig. 4d**).  
193 Furthermore, the absence of SMAD4 largely reverts the gene overexpression (and gene  
194 downregulation) observed after total TGF- $\beta$  signaling deletion in R2SKO CD8 T cells (**Fig.**  
195 **4e**). Thus, SMAD4, in the absence of TGF- $\beta$ , in an anticipatory manner, acts as a basal  
196 and active repressor of TGF- $\beta$ -transcriptional landscape in CD8 T cells.

197 Then we determined functional outcomes of this impressive transcriptional  
198 divergence. A deeper examination of the divergent DEGs highlights many genes  
199 belonging to the T cell effector program. In SMAD4-deficient naïve CD8 T cells, genes  
200 encoding effector molecules such as *Ifn $\gamma$* , *IL12r $\beta$ 2*, *Gzmb*, *Gzma*, *Gzmk*, and *Cd244* were  
201 repressed. Accordingly, the expression of transcription factors known to direct CD8 T cell  
202 effector differentiation (*Tbx21*, *Irf4*, *Zeb2*, and *Eomes*) was also attenuated (**Fig. 4f**).  
203 Conversely, genes associated with quiescence/naiveness of CD8 T cells (eg. *Lef1*, *itgae*,  
204 *Ii7r*, *Ets2*) were slightly enhanced or not significantly affected in SMAD4-deficient CD8 $\alpha\beta$

205 T cells. Single TGF- $\beta$ RII deletion, in contrast, drastically promoted the expression of  
206 effector genes (**Fig. 4f**). A gene set enrichment analysis (GSEA) of all DEGs and the  
207 expression of 43 selected genes associated with T cell activation indicated that similarly  
208 to SKO CD8 T cells, the effector gene predisposition was also repressed in naïve R2SKO  
209 CD8 T cells (**Fig. 4g, Supplementary information, Fig. 4c-d**). Functionally, CD8 T cells  
210 lacking SMAD4 displayed less activation judged by the weaker GZMB and TBET  
211 expression compared to WT and R2KO cells after *in vitro* activation (**Fig. 4h**). Overall,  
212 our data reveal that in the absence of TGF- $\beta$ , SMAD4 restricts transcriptional and  
213 functional TGF- $\beta$  signature in CD8 T cells and endows naïve CD8 T cells with an effector  
214 program.

### 215 **SMAD4 facilitates CD8 T cell response to TGF- $\beta$ , in a TGF- $\beta$ -independent manner**

216 Since SMAD4 deletion limits T cell activation, a compensatory mechanism must  
217 allow microbiota-driven activation of CD8 T cells in the gut. Intriguingly, genes encoding  
218 potent TGF- $\beta$  signaling repressors (e.g. *Smad7*, *Ski*, *Skil* and *Smurf2*) were enhanced in  
219 SKO and R2SKO compared to R2KO CD8 T cells (**Fig. 5a**). We validated the  
220 overexpression of those genes by real-time quantitative RT-PCR on naïve F5 CD8 T cells,  
221 as well as on polyclonal CD8 T cells (**Fig. 5b, Supplementary information, Fig.5a**),  
222 attesting that this overexpression was not restricted to a specific T cell receptor (TCR)  
223 repertoire. The expression defect of TGF- $\beta$  repressors in R2KO CD8 T cells confirmed  
224 that they are TGF- $\beta$  target genes<sup>8,9,26</sup>. Since the double deletion of TGF- $\beta$ RII and SMAD4  
225 (R2SKO) restored the gene expression of TGF- $\beta$  repressors (**Fig. 5b, Supplementary**  
226 **information, Fig.5a**), this demonstrated definitively that SMAD4 inhibits the expression  
227 of TGF- $\beta$  repressors in a TGF- $\beta$ -independent manner.

228 Since those genes are potent repressors of TGF- $\beta$  signaling and have been  
229 associated with a defect of T cell response to TGF- $\beta$  in IBDs<sup>27</sup>, we examined SMAD4-  
230 deficient CD8 T cell TGF- $\beta$ -response. While TGF- $\beta$  inhibited impressively GZMB and  
231 TBET expression in activated WT CD8 T cells even at low doses, impressively, their  
232 expression was maintained even at high concentrations of TGF- $\beta$  in SKO CD8 T cells  
233 (**Fig. 5c-d**). Thus, these observations strongly reveal that SMAD4 ablation totally limits



234 the immune-regulatory effects of TGF- $\beta$  on CD8 T cells. Importantly, this demonstrates  
235 that SMAD4 is crucial for TGF- $\beta$ -mediated immunosuppression and is not redundant.  
236 Because TGF- $\beta$  is highly enriched in the gut<sup>3</sup> and represses T cell activation<sup>28</sup>, this  
237 impaired response to TGF- $\beta$  could contribute to the chronic microbiota-driven CD8 T cell  
238 activation. In order to confirm this assumption *in vivo*, we forced the activation of SMAD4  
239 independent pathways of TGF- $\beta$  signaling by crossing SKO mice with mice bearing a  
240 conditionally-expressed, constitutively-active form of the TGF- $\beta$ R1 (LSL-TGF $\beta$ R1CA  
241 mouse strain)<sup>29</sup>. In the resulting SKO-RCA mice animals, CD8 $\alpha\beta$  T cells were as  
242 abundant and activated in the gut epithelium as in SKO mice (**Fig. 5f-g**), and more  
243 importantly, SKO-RCA mice developed IBDs (**Fig. 5h-i**). Hence, the remaining TGF- $\beta$   
244 signaling pathways are unable to compensate for SMAD4 loss. Collectively, these data  
245 suggest that the TGF- $\beta$ -independent function of SMAD4 facilitates the response of CD8  
246 T cells to TGF- $\beta$ , by restraining the expression of a wide range of TGF- $\beta$  repressors in a  
247 feedforward mechanism (prior to any TGF- $\beta$  signal) and this is crucial and non-redundant  
248 to mediate immune-regulatory-effect of TGF- $\beta$ .

#### 249 **SMAD4 restrains homeostatic survival and epithelial retention of CD8 T cells in a** 250 **TGF- $\beta$ -independent manner**

251 Given that R2KO mice in which T cells do not respond to TGF- $\beta$  signal, do not  
252 exhibit gut inflammation as severe as in SKO and R2SKO mice (**Fig. 1f-i**), additional  
253 factors might enhance the intestinal inflammation in SKO and R2SKO mice. Strategically,  
254 we focused on genes crucial for CD8 T cell homeostasis and epithelial layer retention that  
255 are similarly affected in SKO and R2SKO and inversely in R2KO CD8 T cells. Our first  
256 target was IL-7R, also termed CD127, since it plays a crucial and non-redundant role in  
257 homeostatic survival of CD8 T cells and recent studies associated IL-7 signaling over-  
258 activation and IBDs<sup>30-33</sup>. In line with the RNA-seq data, flow cytometry analysis validated  
259 that naïve F5 SMAD4-deficient (SKO and R2SKO) CD8 T cells overexpressed IL-7R  
260 compared to WT CD8 T cells, in sharp contrast to R2KO CD8 T cells (**Fig. 6a**). Similarly,  
261 we observed this upregulation in CD8 T cells with a polyclonal TCR repertoire  
262 (**Supplementary information, Fig. 6a**). Consistent with the level of IL-7R expression,  
263 STAT5 phosphorylation, which is induced upon IL-7 stimulation, was slightly enhanced in

264 SKO and R2SKO CD8 T cells, and impaired in R2KO CD8 T cells (**Fig. 6b**). A time-course  
265 analysis of survival demonstrated that IL-7 did not prevent R2KO CD8 T cells from dying  
266 *in vitro* compared to SKO and R2SKO CD8 T cells that survived largely better (**Fig. 6c**).  
267 Accordingly, we observed a substantial increase in the absolute number and the  
268 proportion of CD8 T cells in secondary lymphoid organs from SKO and R2SKO F5  
269 transgenic mice, unlike R2KO mice (**Fig. 6d and data not shown**). These findings reveal  
270 a critical role for the TGF- $\beta$ -independent SMAD4 function in restraining CD8 T cell  
271 accumulation by repressing the IL-7 response, in sharp contrast to TGF- $\beta$  signaling.

272       Aside from *Ii7r*, *Itgae* encoding for CD103 was also aberrantly upregulated in  
273 CD8 T cells from SKO mice. CD103 is of great interest as it elicits T cell retention within  
274 the intestinal epithelial layer<sup>34,35</sup>. In agreement with the RNA-seq data, SKO and R2SKO  
275 naïve CD8 T cells exhibited an enhanced level of CD103 (**Fig. 6e**). Similarly, we observed  
276 this upregulation in a polyclonal TCR repertoire (**Supplementary information, Fig. 6b**).  
277 In correlation with the absence of CD103 expression, R2KO CD8 T cells are less enriched  
278 in the intestinal epithelium compared to R2SKO and SKO CD8 T cells (**Supplementary**  
279 **information, Fig. 6c, d and e**). This impaired epithelial tropism of R2KO CD8 T cells may  
280 explain the milder intestinal inflammation observed on those mice compared to R2SKO  
281 mice. In line with this assumption, we next addressed whether the exacerbated expression  
282 of CD103 plays a role in the IBD observed in SKO mice. We treated BM-engrafted mice  
283 with a blocking antibody that specifically recognizes CD103 (**Fig. 6f**). The CD103 blockade  
284 led to a decrease in CD8 T cell numbers within the intestinal epithelium of SKO mice,  
285 without altering their accumulation in secondary lymphoid organs such as the spleen and  
286 mesenteric lymph nodes (**Fig. 6g**). Although this treatment did not fully restore body  
287 weight in SKO, the colon length and immune-histology analysis highlighted clear  
288 improvement (**Fig. 6h-j**). The colon length reduction and the mucosal damage due to  
289 immune infiltration were alleviated, indicating a beneficial effect of CD103 blockade in  
290 SKO mice. Globally, in addition to the impaired response to TGF- $\beta$  immune-regulatory  
291 functions, SMAD4 disruption promotes IL-7 responsiveness and epithelial retention of  
292 CD8 T cells in a TGF- $\beta$ -independent manner. These combined alterations contribute to  
293 the outnumbering and the positioning of CD8 T cells in the gut epithelium of SKO mice  
294 leading to severe chronic intestinal inflammation compared to R2KO mice.

295 **SMAD4, in absence of TGF- $\beta$  signal, binds to promoters and enhancers of a large**  
296 **set of TGF- $\beta$  target genes to regulate their expression in a TGF- $\beta$ -independent**  
297 **manner**

298 To further decipher at the chromatin level the mechanisms by which SMAD4  
299 regulates TGF- $\beta$  signature imprinting in CD8 T cells, prior to any TGF- $\beta$  signal, we  
300 conducted a chromatin immunoprecipitation sequencing (ChIP-seq) of SMAD4 on naïve  
301 CD8 T cells from WT, R2KO and SKO mice. 2982 peaks were identified in WT cells and  
302 3432 peaks were identified in R2KO cells, demonstrating that SMAD4 binds to the  
303 genome even without TGF- $\beta$  signal in CD8 T cells. Since most of the binding sites were  
304 localized in promoter regions (64% for the WT and 67% for the R2KO) or were closely  
305 located around the transcription start site (TSS) regions, this suggests grandly that  
306 SMAD4 directly regulates many variety of genes (**Fig. 7a-b, Supplementary**  
307 **information, Fig.7a**). Accordingly SMAD4 binds irrespective or not to TGF- $\beta$  signaling to  
308 genomic regions that regulate diverse biological pathways involved for instance in TCR  
309 signaling, RNA translation or TGF- $\beta$  signaling regulation (**Supplementary information,**  
310 **Fig. 7b**). This data highlights the broad potential impact of TGF- $\beta$ -independent function of  
311 SMAD4 in diverse CD8 biological processes and emphasizes its interest. Then, we asked  
312 whether the genome-wide occupancy of SMAD4 is distinct with or without TGF- $\beta$   
313 signaling. Of the 2982 peaks in WT cells and 3432 peaks in R2KO cells, 1954 peaks were  
314 common, highlighting an important similarity in regional binding sites irrespective of the  
315 cellular response to TGF- $\beta$  (**Fig. 7c**). Thus, this observation reveals that SMAD4, before  
316 any TGF- $\beta$ R-engagement, occupies promoters and enhancers of different genes likely for  
317 regulating their expression.

318 By combining the ChIP-seq peaks of SMAD4 and the DEGs from RNA-seq data  
319 (**Figure 4**), we found 541 genes that are potentially directly regulated by SMAD4 (**Fig.**  
320 **7d**). Focusing on genes that were differentially expressed between WT and SKO cells and  
321 between R2KO and SKO cells, we found 103 genes. Among those 103 genes, we found  
322 genes implicated in CD8 T cell differentiation such as *Tcf4* and *Lef1* but also many well-  
323 characterized TGF- $\beta$ -target genes. Importantly, we found TGF- $\beta$ -repressors (*Smad7*,  
324 *Smurf2*, *Ski*, *Skil*) and genes involved in lymphocyte epithelial retention (*Itgae*) (**Fig. 7d**,

325 **7e, Supplementary information, Fig. 7c).** Thus, SMAD4, directly by acting at the  
326 chromatin level could restrict TGF- $\beta$  target gene expression. To identify putative partners  
327 of SMAD4 in WT and R2KO CD8 T cells, we conducted an enrichment motif analysis and  
328 uncovered similar motifs in the top 3 enriched motifs, notably ETS and RUNX family  
329 domains, indicating a potential interaction between SMAD4 and ETS or RUNX  
330 transcription factor families (**Fig. 7f, 7g**). Thus, revealing that SMAD4 interacts likely with  
331 different partners to mediate its wide transcriptional impact in CD8 T cells.

332 Finally, to gain further insight into the epigenetic mechanisms by which SMAD4  
333 mediates TGF- $\beta$  target-gene repression before TGF- $\beta$ -signal, we performed a ChIP of  
334 SMAD4 and a ChIP of a histone mark associated with gene expression, namely the  
335 acetylation of the 27<sup>th</sup> lysine residue of the histone H3 protein (H3K27ac). We found that  
336 H3K27ac was enriched at the same SMAD4 binding regions of *Smad7*, *Skil* and *Itgae*,  
337 specifically in the absence of SMAD4 (SKO and R2SKO CD8 T cells). In contrast, we  
338 observed less enrichment in these SMAD4 binding regions in R2KO CD8 T cells. This  
339 indicates that SMAD4, in a TGF- $\beta$ -independent manner and oppositely to TGF- $\beta$  signal,  
340 promotes histone acetylation of TGF- $\beta$  target gene promoters and enhancers mediating  
341 their repression (**Fig. 7h-i**). Collectively, these findings highlight an upstream mechanism  
342 by which SMAD4, in CD8 T cells, mediates epigenetic control of a wide range of TGF-  
343  $\beta$  target genes in the absence of TGF- $\beta$  signaling, in anticipatory manner, and imposes a  
344 restriction of TGF- $\beta$  signature, preventing IBDs.

345

## 346 **Discussion**

347 Our study uncovers an uncharacterized critical feedforward regulation of the TGF-  
348  $\beta$  effect governed by SMAD4 in CD8 T cells in a TGF- $\beta$  independent manner, crucial to  
349 prevent chronic intestinal inflammation. Indeed, we reveal that the TGF- $\beta$ -independent  
350 function of SMAD4 acts as a basal and active repressor of a myriad of TGF- $\beta$  target genes,  
351 restraining the TGF- $\beta$  signature in CD8 T cells in the absence of any TGF- $\beta$  signaling.  
352 Therefore, ablation of SMAD4 impairs the effector predisposition of naïve CD8 T cells.  
353 However, SMAD4 ablation promotes CD8 T cell accumulation, and intestinal epithelial

354 retention, in sharp contrast to total TGF- $\beta$  signaling ablation. Besides, by inducing gene  
355 expression of the TGF- $\beta$  negative feedback loop, SMAD4 ablation likely predisposes CD8  
356 T cells to escape from the immune-regulatory effects of TGF- $\beta$  and subsequently,  
357 combined with their incline for epithelial tropism, promotes their massive gut epithelial  
358 restricted chronic activation.

359 Although largely overlooked, emerging evidence over the last decade suggests that  
360 the presence and aberrant activation of CD8 T cells in the intestinal mucosa correlate with  
361 IBDs <sup>33,36,37</sup>. Mechanisms leading to CD8 T cell activation in IBDs remain elusive. In a  
362 seminal work, Massague et al, demonstrated the importance of TGF- $\beta$  in controlling T cell  
363 effector gene expression and suggested SMAD3 in the mechanism <sup>38</sup>. However, the exact  
364 signaling branch of TGF- $\beta$ , critical in establishing TGF- $\beta$ -driven-immunosuppression,  
365 remains imprecise. We revealed that the absence of SMAD4 strongly impaired CD8 T cell  
366 response to TGF- $\beta$ , thereby eliciting their activation that even a high dose of TGF- $\beta$  or  
367 even a genetic activation of TGF- $\beta$  remaining pathways cannot overcome. Our study  
368 demonstrated that amongst the different branches of TGF- $\beta$ , SMAD4 appears to play a  
369 critical and non-redundant role in mediating immunosuppression induced by TGF- $\beta$  in  
370 CD8 T cells.

371 Our current results reveal that TGF- $\beta$ -independent SMAD4 function predisposes  
372 an effector differentiation program in naïve CD8 T cells. It has been described that SMAD4  
373 contributes to T cell activation by inducing c-Myc during T cell activation <sup>22</sup>. Here, we  
374 revealed that SMAD4-promoted T cell activation intervenes prior to any cognate antigen  
375 encounter. Our findings enforce studies questioning the previously presented naïve T cell  
376 dogma where naïve T cells are considered unpoised and homogeneous <sup>39</sup>. Indeed,  
377 depending on the developmental origin, naïve CD8 T cells could be differentially “pre-  
378 programmed” thereby profoundly affecting their fate after peripheral cognate antigen  
379 encounter <sup>40</sup>. However, the mechanism of this ‘pre-programing’ remains elusive. Our data  
380 suggest that, in contrast to TGF- $\beta$  engagement, TGF- $\beta$ -independent SMAD4 function  
381 promotes an effector commitment. Future investigations will be required to determine the  
382 molecular partners of SMAD4 that are important in mediating this effector engagement in  
383 naïve CD8 T cells.

384

385 SMAD4 deletion imposes a TGF- $\beta$ -imprinting in CD8 T cells. TGF- $\beta$  is critical for  
386 CD103 induction and IELs formation and retention in the gut<sup>34,41</sup>. The fact that irradiated  
387 mice reconstituted with BM cells from TGF- $\beta$ RII KO mice did not exhibit such a severe  
388 intestinal inflammation as TGF- $\beta$ RII and SMAD4 double knockout mice is likely due to the  
389 lack of retention molecules such as CD103 in the former case. Indeed, ablation of SMAD4  
390 in a setting of TGF $\beta$ -RII deficiency restores the epithelial retention capacity of CD8 $\alpha\beta$  T  
391 cells and may explain the more severe intestinal immunopathology observed in R2SKO  
392 compared to R2KO mice. Accordingly, CD103-blockade alleviates intestinal  
393 immunopathology in SMAD4-deficient mice. This indicates the crucial role exerted by  
394 SMAD4, in absence of TGF- $\beta$  signal, in limiting epithelial retention of CD8 T cells.

395 Deletion of SMAD4, in some lymphocytes such as NK cells, enhances their  
396 response to TGF- $\beta$  likely by curtailing the TGF- $\beta$ -SMAD4-independent pathways  
397 (encompassing TRIM33 and the non-canonical pathways)<sup>42</sup>. We have first envisaged a  
398 similar mechanism (of hyper-responsiveness to TGF- $\beta$ ) in our study. However, we  
399 unveiled that CD8 T cells lacking SMAD4 exhibit a strong defect to respond to TGF- $\beta$ .  
400 Interestingly, this impressive defect was reminiscent of what is observed in patients  
401 suffering from IBDs and CRCs<sup>16</sup>. Indeed, due to an elevated expression of the TGF- $\beta$   
402 repressor, SMAD7, T cells from those patients are not responsive to the immunoregulatory  
403 effect of TGF- $\beta$ , highly enriched within the intestine<sup>3,17</sup>. The impaired responsiveness to  
404 TGF- $\beta$  explains why SMAD4 depletion could attenuate CD8 T cell effector differentiation  
405 on the one hand<sup>22</sup> but allows their chronic activation within the intestine, on the other  
406 hand, thereby reconciling this dichotomy. Indeed, insensitive to the TGF- $\beta$  signal, SMAD4-  
407 deficient CD8 T cells could be chronically activated within the intestine, exhibit an effector  
408 program and contribute to IBDs.

409 SMAD4 deletion and total TGF- $\beta$  signaling disruption have a striking opposite  
410 transcriptional and functional outcome. We show that SMAD4 binds to promoter regions  
411 of numerous TGF- $\beta$  target genes and regulates inversely their expression in the absence  
412 of TGF- $\beta$  signal by inducing epigenetic modifications such as chromatin acetylation.

413 Indeed, before any TGF- $\beta$  signal, SMAD4 restricts TGF- $\beta$  signature, in an anticipatory  
414 mechanism, to potentiate and sensitize CD8 T cells to the effect of TGF- $\beta$  once a TGF- $\beta$   
415 signal is received. Indeed this negative feedforward action limits the basal expression of  
416 TGF- $\beta$  target genes and allow likely a better fine tune-regulation. In line with this concept  
417 of TGF- $\beta$  -potentiation, by repressing a wide range of potent TGF- $\beta$  repressors such as  
418 *Smad7*, *Ski*, *Skil* and *Smurf2*, SMAD4 facilitates TGF- $\beta$  effect, in a TGF- $\beta$  independent  
419 manner. This original negative feedforward regulation governed by SMAD4 explains the  
420 dual effect by which SMAD4 restrains TGF- $\beta$  outcome, prior to TGF- $\beta$  signal, but also  
421 potentiates it after TGF- $\beta$ R engagement.

422 In summary, our study reveals that SMAD4 pre-conditions the fate of naïve CD8 T  
423 cells. We uncover a critical and non-redundant feedforward regulation governed by  
424 SMAD4 that finely preprograms naïve CD8 T cell homeostasis, with direct consequences  
425 on chronic intestinal inflammation.

426

427

428

429

430

431

432

433

434

435

436

437

## 438 **Figure legends**

439 **Figure 1: SMAD4 in T cells prevents chronic intestinal inflammation largely in a TGF- $\beta$  -**  
440 **independent manner. (a):** Scheme representing pathways of TGF- $\beta$  signaling and mice models.  
441 **(b):** On the left panel, body weight of mice from 1 to 10 months old (n= 2 to 10 mice per group for  
442 each time point) and on the right panel, weight of the mice at 5-7 months old (n=6 to 10 mice per  
443 group). All mice are male. **(c-d):** Representative pictures of colon and duodenum, colon length  
444 and duodenum enlargement of the different strains of mice at 7 months of age. **(e):** Representative  
445 Hematoxylin & Eosin (H&E) staining of duodenum and colon sections of different mouse strains  
446 at 7 months old. Scale bar represents 50 $\mu$ m. **(f-i):** Irradiated RAG2KO mice were reconstituted  
447 with WT, R2KO, SKO, or R2SKO bone marrow (BM) cells; Percentage change in body weight  
448 between the beginning and the end of experiment **(f)**; colon length **(g)**; histological intestinal  
449 damage score **(h)**; and representative Hematoxylin & Eosin (H&E) staining of duodenum and  
450 colon sections **(i)**. Scale bar represents 50 $\mu$ m. Red arrows highlight crypt abscesses. All Data  
451 represent at least 3 independent experiments (C, D, E, F, G, H, I) and presented as mean  $\pm$  SD.  
452 Each symbol represents an individual mouse. Data were analyzed by unpaired Student t Test. ns:  
453 nonsignificant; \* p<0,05; \*\*p < 0.01; \*\*\*p < 0.001; \*\*\*\*p < 0.0001.

454 **Figure 2: CD8 $\alpha\beta$  T cell-depletion prevents intestinal inflammation upon SMAD4 deletion in**  
455 **T cells. (a):** Scheme of the *in vivo* CD8 $\beta$  and CD4 depletion experiment. RAG2KO mice were sub-  
456 lethally irradiated and reconstituted with WT or SKO BM cells. 20 days after reconstitution, mice  
457 were injected or not intraperitoneally with an anti-CD8 $\beta$  or anti-CD4 depleting antibody. **(b):** Body  
458 weight at day 40 after WT or SKO BM reconstitution and treatment with anti-CD8 $\beta$  or anti-CD4  
459 depleting antibody. **(c):** Representative pictures of colons and colon length measurement of BM  
460 reconstituted mice, treated with anti CD8 $\beta$  or anti-CD4 depleting antibody. **(d):** Representative  
461 Hematoxylin & Eosin (H&E) staining of duodenum and colon sections of irradiated mice  
462 reconstituted with WT or SKO BM cells and treated with anti-CD8 $\beta$  or anti-CD4 depleting antibody.  
463 Scale bar represents 50 $\mu$ m. All data represent at least 3 independent experiments and presented  
464 as mean  $\pm$  SD. Each symbol represents an individual mouse. Data were analyzed by unpaired  
465 Student t test. ns: nonsignificant; \* p<0,05; \*\*p < 0.01; \*\*\*p < 0.001; \*\*\*\*p < 0.0001.

466 **Figure 3: SMAD4 in T cells prevents microbiota-mediated accumulation and epithelial**  
467 **activation of CD8 $\alpha\beta$  T cells. (a):** Representative flow cytometry data showing the frequency of  
468 CD8 $\alpha\beta$  T cells among CD45+ cells in the spleen and epithelium from the colon and small intestine  
469 of 7 months aged mice, (n= minimum 4 mice per group). **(b):** Representative pictures showing



470 immune-fluorescence staining of CD8 $\beta$  (green), E-cadherin (red), DAPI (blue) in the small  
471 intestine and colon sections of 7 months-aged WT and SKO mice. **(c)**: Flow cytometry staining of  
472 GZMA, GZMB and IFN- $\gamma$  among splenic and colonic intra-epithelial lymphocytes CD8 $\alpha\beta$  T cells.  
473 **(d-e)**: Effect of antibiotic (ATB) treatment on the frequency, numbers, and activation of colonic  
474 intraepithelial CD8 $\alpha\beta$  T cells from WT and SKO mice. All data represent at least 3 independent  
475 experiments and presented as mean  $\pm$  SD. Each symbol represents an individual mouse. Data  
476 were analyzed by unpaired Student t test. ns: nonsignificant; \*  $p < 0,05$ ; \*\* $p < 0.01$ ; \*\*\* $p < 0.001$ ;  
477 \*\*\*\* $p < 0.0001$ .

478  
479 **Figure 4: In absence of TGF- $\beta$  signal, SMAD4 represses TGF- $\beta$  signature in naïve CD8 $\alpha\beta$  T**  
480 **cells inversely of TGF $\beta$ RII signaling. (a)**: Venn diagram showing the numbers of differentially  
481 expressed genes between WT, R2KO, and SKO naïve F5 CD8 $\alpha\beta$  T cells. **(b)**: Heatmap showing  
482 the hierarchical clustering of differentially expressed genes between WT, SKO, and R2KO F5  
483 naïve CD8 $\alpha\beta$  T cells. **(c)**: Fold change (logarithmic scale) of gene expression of SKO vs WT (in  
484 orange) and R2KO vs WT (in green). DEGs correspond to those shown in heatmap 4B **(d)**:  
485 Volcano plot of RNA-seq data from R2KO, SKO, and R2SKO naïve F5 CD8 $\alpha\beta$  T cells. The data  
486 for all genes is plotted as log<sub>2</sub> fold change versus the  $-\log_{10}$  of the adjusted p-value. Genes  
487 selected as significantly different are highlighted as green and red dots. Some example genes are  
488 labelled with gene symbols. **(e)**: Heatmap showing the Log<sub>2</sub> fold change expression of genes of  
489 cluster II and III highlighted in Fig.2b, and for each condition, the heatmap value corresponds to  
490 the KO relative to WT (average of 3 biological replicates). **(f)**: Heatmaps showing the expression  
491 of genes linked to CD8 T cell effector functions and genes linked to naïve and quiescence stage  
492 on WT, SKO or R2KO F5 naïve CD8 $\alpha\beta$  T cells. **(g)**: Violin plot showing the relative expression of  
493 effector genes from R2KO, SKO, and R2SKO CD8 T cells compared to WT. **(h)**: Flow cytometry  
494 staining for GZMB and TBET in F5 CD8 $\alpha\beta$  T cells after anti CD3/CD28 stimulation for 4 days *in*  
495 *vitro*. All data represent at least 3 independent experiments and presented as mean  $\pm$  SD. Each  
496 symbol represents an individual mouse. Data were analyzed by unpaired Student t test. ns:  
497 nonsignificant; \*  $p < 0,05$ ; \*\* $p < 0.01$ ; \*\*\* $p < 0.001$ ; \*\*\*\* $p < 0.0001$ .

498  
499  
500 **Figure 5: SMAD4 depletion promotes expression of TGF- $\beta$  repressors and impedes TGF- $\beta$**   
501 **response in CD8 $\alpha\beta$  T cells *in vitro* and *in vivo*. (a)**: Volcano plot showing TGF- $\beta$  inhibitory  
502 genes in SKO (orange), R2KO (green), and R2SKO (brown) F5 naïve CD8 $\alpha\beta$  T cells, all relative

503 to WT. **(b)**: Quantitative RT-PCR analysis of the expression of indicated TGF- $\beta$  regulatory genes  
504 in F5 naïve CD8 $\alpha\beta$  T cells from spleen of WT, R2KO, SKO, and R2SKO mice (n=5-6). These mice  
505 are different from those used for RNA-seq data. **(c-d)**: Flow cytometry data showing WT or SKO  
506 CD8 $\alpha\beta$  T cell-inhibition of GZMB and TBET after anti CD3/CD28 stimulation with or without  
507 recombinant TGF- $\beta$  at 10ng/ml **(c)** or different concentrations **(d)**. The percentage of inhibition of  
508 CD8 $\alpha\beta$  T cells was appreciated by calculating the ratio between anti CD3/CD28 + TGF- $\beta$  condition  
509 and anti CD3/CD28 alone. **(e-f)**: representative flow cytometry plots showing the frequency of  
510 CD8 $\alpha\beta$  T cells among CD45+ cells present within the colonic epithelium **(e)**, and intra cellular  
511 staining for GZMB among colonic epithelial CD8 $\alpha\beta$  T cells **(f)**; Body weight **(g)**; and Hematoxylin  
512 & Eosin (H&E) staining of duodenum and colon sections **(h)**; from 8 months aged WT, RCA, SKO  
513 and SKO-RCA mice, (n= minimum 6 mice per group). Scale bar represents 200 $\mu$ m. All data  
514 represent at least 3 independent experiments and presented as mean  $\pm$  SD. Each symbol  
515 represents an individual mouse. Data were analyzed by unpaired Student t test. ns:  
516 nonsignificant; \* p<0,05; \*\*p < 0.01; \*\*\*p < 0.001; \*\*\*\*p < 0.0001.

517 **Figure 6: SMAD4 promotes homeostatic survival and epithelial retention of CD8 $\alpha\beta$  T cells**  
518 **in an opposite way to TGF $\beta$ RII signaling. (a)**: Flow cytometry staining of CD127 on WT, R2KO,  
519 SKO and R2SKO F5 naïve CD8 $\alpha\beta$  T cells. **(b)**: Flow cytometry staining of p-STAT5 after IL-7 *in*  
520 *vitro* treatment in WT, R2KO, SKO and R2SKO F5 naïve CD8 $\alpha\beta$  T cells. **(c)**: Survival monitoring  
521 of WT, R2KO, SKO, or R2SKO naïve F5 CD8 $\alpha\beta$  T cells treated or not with IL-7. **(d)**: Flow  
522 cytometry data showing the frequency with absolute numbers of F5 naïve CD8 $\alpha\beta$  T cells among  
523 CD45+ cells in the spleen of 3 months aged WT, R2KO, SKO and R2SKO F5 mice. **(e)**: Flow  
524 cytometry staining of CD103 on WT, R2KO, SKO and R2SKO F5 naïve CD8 $\alpha\beta$  T cells. **(f-g)**:  
525 Experimental procedure for anti-CD103 blocking treatment **(f)**; CD8 T cell numbers **(g)**, Body  
526 weight **(h)**; colon length **(i)**; and Hematoxylin & Eosin (H&E) staining of duodenum and colon  
527 sections **(j)** of irradiated mice reconstituted with WT or SKO BM cells and treated or not with anti-  
528 CD103 blocking antibody. Scale bar represents 200 $\mu$ m. All data represent at least 3 independent  
529 experiments and presented as mean  $\pm$  SD. Each symbol represents an individual mouse. Data  
530 were analyzed by unpaired Student t test. ns: nonsignificant; \* p<0,05; \*\*p < 0.01; \*\*\*p < 0.001;  
531 \*\*\*\*p < 0.0001.

532 **Figure 7: SMAD4 represses directly TGF- $\beta$  target genes by histone deacetylation without**  
533 **requirement of TGF- $\beta$  signaling. (a)**: The proportions of SMAD4 peaks associated with  
534 promoter, 5 UTR, 3 UTR, exon, intron, and intergenic regions in WT and R2KO naïve F5 CD8 $\alpha\beta$   
535 T cells. **(b)**: Enriched heatmaps showing the SMAD4-occupancy signals in genomically

536 aggregated TSS regions in WT and R2KO CD8 T cells. Each panel represents 2 kb upstream and  
537 downstream of the TSSs **(c)**: Venn diagram showing the number of SMAD4 common peaks  
538 between WT and R2KO naïve CD8 $\alpha\beta$  T cells. **(d)**: Venn diagram showing the overlap between  
539 SMAD4 ChIP-seq peaks and RNA-seq DEGs. **(e)**: SMAD4 binding ChIP-seq peaks in WT (blue),  
540 R2KO (green) or SKO control (orange), in corresponding genes. **(f)**: Transcription factor (TF) top  
541 motifs in SMAD4 binding sites in WT and R2KO CD8 T cells. X-axis represents the logP-value of  
542 the motif enrichment. Y-axis represents the fold change of the motif enrichment. **(g)**: The three  
543 top motifs found by Hypergeometric Optimization of Motif Enrichment (HOMER) analysis among  
544 SMAD4 binding peaks in WT and R2KO CD8 T cells. **(h)**: q-PCR-based ChIP analysis of SMAD4  
545 on the promoters/enhancers of *Smad7*, *Skil* and *Itgae* in WT, R2KO and SKO F5 naïve CD8 $\alpha\beta$  T  
546 cells. Each point represents a pool of minimum 3 mice. **(i)**: qPCR-based ChIP analysis of H3K27ac  
547 on the promoters/enhancers of *Smad7*, *Skil* and *Itgae* in WT, R2KO, SKO, and R2SKO F5 naïve  
548 CD8 $\alpha\beta$  T cells. Each point represents a pool of minimum 3 mice.

549

550

## 551 **Supplementary figure legends**

552

553 **Supplementary figure 1: relative to figure 1. (a)**: Flow cytometry staining of SMAD4 and TGF $\beta$ -  
554 RII in T cells and non-T cells from WT, TKO, SKO, STKO and R2SKO mice. **(b)**: Representative  
555 Hematoxylin & Eosin (H&E) staining of duodenum and colon sections from 7 months-aged WT,  
556 TKO, SKO, STKO and R2SKO mice. **(c)**: Representative Hematoxylin & Eosin (H&E) staining of  
557 duodenum and colon sections of irradiated RAG2KO mice reconstituted with WT, R2KO, SKO, or  
558 R2SKO BM cells.

559

560 **Supplementary figure 2: relative to figure 2. (a-b)**: Representative flow cytometry plots showing  
561 the frequency of CD4 and CD8 $\alpha\beta$  T cells **(a)**; TCR $\gamma\delta$  and CD8 $\alpha\alpha$  **(b)** among CD45+ cells in the  
562 MLN and intra epithelial lymphocytes of irradiated RAG2KO mice reconstituted with WT BM cells  
563 and injected with PBS or anti-CD8 $\beta$  or anti-CD4 depleting antibody. **(c-d)**: Representative pictures  
564 of colon **(c)** and body weight shown as relative to WT **(d)** of irradiated RAG2KO mice reconstituted  
565 with WT or R2SKO bone marrow cells and treated with anti-CD8 $\beta$  depleting antibody or PBS. **(e-**  
566 **g)**: Experimental procedure for mixed bone marrow transplantation in irradiated RAG deficient  
567 mice **(e)**, colon length **(f)** and Body weight **(g)** of irradiated mice reconstituted with mixed WT and  
568 R2SKO BM cells. All data represent at least 3 independent experiments and presented as mean

569 ± SD. Each symbol represents an individual mouse. Data were analyzed by unpaired Student t  
570 test. ns: nonsignificant; \* p<0,05; \*\*p < 0.01; \*\*\*p < 0.001; \*\*\*\*p < 0.0001.

571  
572  
573 **Supplementary figure 3: relative to figure 3. (a):** Histograms showing the absolute numbers of  
574 CD8αβ T cells in the spleen and colonic intra epithelial lymphocytes of 7 months aged WT, TKO,  
575 SKO, STKO and R2SKO mice. **(b):** Histograms showing the frequency of CD8αβ T cells in the  
576 peripheral lymph nodes (PLN), lungs and the skin of 7 months-aged WT, SKO and R2SKO mice.  
577 **(c):** Flow cytometry staining of GZMA and GZMB in CD8αβ T cells of the epithelium of the small  
578 intestine of WT, TKO, SKO, STKO and R2SKO mice. **(d):** Histograms showing the frequency of  
579 TNF-α and CCL3 producing CD8αβ T cells in the colonic epithelium of 7 months-aged WT and  
580 SKO mice. **(e):** CD103 and GZMB staining showing that activated CD8αβ T cells are mainly  
581 CD103+ and present in the intestinal epithelium. **(f):** Flow cytometry staining of GZMA and GZMB  
582 in the colonic *lamina propria* CD8αβ T cells of WT, TKO, SKO, STKO and R2SKO mice. **(g):** The  
583 frequency of GZMB producing CD8αβ T cells in the PLN, lungs and the skin of 7 months-aged  
584 WT, SKO and R2SKO mice. All data represent at least 3 independent experiments and presented  
585 as mean ± SD. Each symbol represents an individual mouse. Data were analyzed by unpaired  
586 Student t test. ns: nonsignificant; \* p<0,05; \*\*p < 0.01; \*\*\*p < 0.001; \*\*\*\*p < 0.0001.

587 **Supplementary figure 4: relative to figure 4. (a):** Representative pictures of colon and  
588 duodenum from F5 TCR transgenic WT, R2KO and SKO 8 months-aged mice. **(b):** Pie chart  
589 showing the frequency of each cluster (related to Fig. 2b). **(c):** Gene Set Enrichment Analysis  
590 (GSEA) plot comparing gene expression arrays related to naïve or effector state of WT, R2KO,  
591 SKO, and R2SKO CD8αβ T cells. **(d):** List of the 43 selected genes related to the CD8 T cell  
592 effector state.

593  
594  
595 **Supplementary figure 5: relative to figure 5. (a):** Quantitative RT-PCR analysis of the  
596 expression of indicated TGF-β regulatory genes in polyclonal CD8αβ T cells from spleen of WT,  
597 SKO, and R2SKO mice. All data represent at least 3 independent experiments and presented as  
598 mean ± SD. Each symbol represents an individual mouse.

599  
600 **Supplementary figure 6: relative to figure 6. (a-b):** Flow cytometry staining of CD127 **(a)** and  
601 CD103 **(b)** on polyclonal CD8αβ T cells in the spleen and MLN of WT, SKO and R2SKO mice.

602 **(c):** Flow cytometry staining of CD103 on naïve (CD44 negative CD8 T cells) and memory (CD44  
603 positive CD8 T cells) from irradiated and transplanted mice. **(d)** Histogram showing the frequency  
604 of CD8 $\alpha\beta$  T cells among CD45+ live cells in the colonic epithelium of RAG2KO irradiated mice  
605 and reconstituted with WT, R2KO, SKO or R2SKO BM cells **(e):** Representative pictures showing  
606 immune-fluorescence staining of CD8 $\beta$  (green), E-cadherin (red), DAPI (blue) in the small  
607 intestine and colon sections of RAG2KO irradiated mice reconstituted with WT, R2KO, or R2SKO  
608 BM cells. **(i):** All data represent at least 3 independent experiments and presented as mean  $\pm$  SD.  
609 Each symbol represents an individual mouse. Data were analyzed by unpaired Student t test. ns:  
610 nonsignificant; \*  $p < 0,05$ ; \*\* $p < 0.01$ ; \*\*\* $p < 0.001$ ; \*\*\*\* $p < 0.0001$ .

611  
612 **Supplementary figure 7: relative to figure 7. (a)** Enriched heatmaps showing the SMAD4-  
613 occupancy signals in WT, SKO and R2KO (SKO was used as a negative control)**(a):** Biological  
614 pathway enrichment analysis in SMAD4 binding genes in WT and R2KO CD8 T cells **(b):** List of  
615 common genes that have a SMAD4 positive binding peak and are differentially expressed  
616 between WT, SKO and R2KO naïve F5 CD8 $\alpha\beta$  T cells.

617

618

619

620

621

622

623

624

625

626

627

628

629

## 630 **Materiel and Method**

### 631 **Mice**

632 *CD4-Cre;Smad4<sup>flox/flox</sup>* (SKO), *CD4-Cre;Trim33<sup>flox/flox</sup>* (TKO)REF , *CD4-Cre;Smad<sup>flox/flox</sup>Trim33<sup>flox/flox</sup>*  
633 (*STKO*), *CD4-Cre;Smad<sup>flox/flox</sup>Tgf-βRII<sup>flox/flox</sup>* (R2SKO), *CD4-Cre;Tgf-βRII<sup>flox/flox</sup>* , *CD4-Cre;Smad4<sup>flox/flox</sup>*  
634 *Stop<sup>flox/flox</sup>TGF-βRI<sup>CA</sup>* and RAG2KO mice were crossed and maintained in AniCan, a specific  
635 pathogen free animal facility of the Centre de Recherche en Cancérologie de Lyon (CRCL), Lyon,  
636 France. Unless mentioned otherwise, male and female mice were used. The experiments were  
637 performed in accordance with the animal care guidelines of the European Union and French laws  
638 and were validated by the local Animal Ethic Evaluation Committee (CECCAP).

### 639 **Antibiotic treatment**

640 For antibiotics treatment, drinking water was supplemented with an antibiotic cocktail composed  
641 with Ampicillin (1g/L), Metronidazole (1g/L), Neomycin (1g/L), Vancomycin (0.5g/L) all purchased  
642 from Sigma-Aldrich. Antibiotic treatment was administrated just after weaning and until 5 months  
643 of age.

### 644 **Bone marrow transfer, CD8/CD4 depletion, and CD103 blockade**

645 RAG2KO mice were irradiated (6 Gray) and reconstituted by intra-orbital injections with 10<sup>6</sup> T cell-  
646 depleted bone marrow cells either from WT, R2KO, SKO or R2SKO mice. For the CD8/CD4  
647 depletion, 20 days after BM reconstitution, mice received intraperitoneally 150µg of anti CD8β  
648 (clone. 53-5.8 Bioxcell) or anti CD4 (clone GK1.5, Bioxcell) once a week. We note that we used  
649 different antibody clones to verify the depletion by flow cytometry. For CD103 blockade, RAG2KO  
650 mice were irradiated (6 Gray) and reconstituted by intra-orbital injections with 10<sup>6</sup> T cell-depleted  
651 bone marrow cells either from WT or SKO mice and 14 days after BM reconstitution, mice received  
652 intraperitoneally 100µg of anti CD103 blockade antibody (clone. M290 InVivoMab) or PBS 3 times  
653 per week.

654

### 655 **Histological Assessment of Inflammation**

656 Colon and small intestine were fixed in 2% formaldehyde (VWR), embedded in paraffin and  
657 sectioned. Hematoxylin/eosin (Sigma Aldrich) staining was performed in embedded  
658 tissue. Intestinal inflammation was scored in a blinded fashion using a scoring system based on  
659 the following criteria: colon length, inflammatory cell infiltrate (severity and extent), crypt

660 hyperplasia, presence of neutrophils within the crypts, presence of crypt abscesses, erosion,  
661 granulation tissues and villous blunting.

### 662 **Isolation of solenocytes, lymph nodes, lung, skin, intra epithelial and *lamina propria* cells**

663 Spleens, peripheral (inguinal and axillary) or mesenteric lymph nodes were dissociated on nylon  
664 mesh and red blood cells were lysed with NH<sub>4</sub>Cl 9g/L (vol/vol). Lungs and ears were cut in small  
665 pieces and incubated in RPMI medium (Gibco) containing 20% Fetal Bovine Serum (Gibco),  
666 DNase I Roche) at 100µg/ml and Collagenase from Clostridium Histolyticum (Sigma Aldrich) at  
667 0.6mg/ml. For lungs, mice were perfused with PBS 1X, filtered and centrifuged on a percoll  
668 gradient 67%/44%. Small and large intestines were dissected after removing fat and payer  
669 patches. Intestines were longitudinally opened and washed in PBS 1X. Intestines were cut into  
670 small pieces and incubated with 5mM EDTA, 1mM DTT (Sigma Aldrich) at 37°C, under agitation.  
671 Epithelial cells and IELs were separated from tissue after 20 min. Tissues were then digested in  
672 RPMI medium (Gibco) containing 20% Fetal Bovine Serum (Gibco), DNase I Roche) at 100µg/ml  
673 and Collagenase from Clostridium Histolyticum (Sigma Aldrich) at 0.6mg/ml. Intestinal LP was  
674 harvested from a 44% - 67% percoll gradient run for 20min at 1300 x g.

675

### 676 **Flow cytometry**

677 Intra cellular and surface cell staining were performed using the following antibodies:

| Antibody   | Fluorochrome    | Clone         | Company      |
|------------|-----------------|---------------|--------------|
| CD8β       | Alexa Fluor 488 | eBioH35-17.2  | Ebioscience  |
| CD8β       | Alexa Fluor 700 | YTS156.7.7    | Biologend    |
| CD8α       | BV605           | 53-6.7        | Biologend    |
| CD45       | BV711           | 30-F11        | BD           |
| CD3        | BV650           | 145-2C11/17A2 | BD/Biologend |
| CD4        | V500            | RM4-5         | BD           |
| Granzyme A | PerCP-eF710     | GzA 3G8.5     | eBiosciences |
| Granzyme B | APC             | REA226        | Miltenyi     |
| IFNγ       | APC             | XMG1.2        | eBiosciences |
| TNFα       | Pe Cy7          | MP6-XT22      | Abcam        |
| CCL3       | PE              | REA355        | Miltenyi     |

|                                                 |                 |               |                                 |
|-------------------------------------------------|-----------------|---------------|---------------------------------|
| CD103                                           | eF450/bv421     | 2E7/M290      | eBioscience/BD<br>678           |
| CD127 (IL-7Ra)                                  | APC-eF780       | A7R34         | eBioscience<br>679              |
| CD44                                            | PerCP-Cy5.5     | IM7           | BD<br>680                       |
| T-bet                                           | PE-Cy7          | eBio4B10      | eBioscience<br>681              |
| Mouse anti mouse<br>E-cadherin                  | purified        | 36/E-Cadherin | BD<br>682                       |
| p-stat5 (p-Y694)                                | Alexa Fluor 647 | 47/Stat5      | BD<br>683                       |
| Rabbit anti mouse<br>p-smad2<br>(Ser465/Ser467) | purified        | E8F3R         | Cell Signaling<br>684<br>685    |
| TCR $\gamma\delta$                              | PE              | GL3           | BD<br>686                       |
| Donkey Anti mouse<br>IgG (H+L)                  | APC             |               | Life Technologies<br>687<br>688 |
| Goat Anti rabbit<br>IgG (H+L)                   | A488            |               | Life Technologies<br>689<br>690 |

691

692 For IFN $\gamma$ , TNF $\alpha$ , and CCL3 cytokine staining, cells were stimulated *ex vivo* for 4h with 1mg/ml  
693 PMA (Sigma Aldrich) and 1mg/ml Ionomycin (Sigma Aldrich) in presence of Brefeldin A (BD  
694 pharmingen) and Golgi Stop. After extracellular staining, cells were fixed and permeabilized using  
695 Cytofix/Cytoperm kit (BD) for IFN $\gamma$ , TNF $\alpha$ , CCL3 staining and Fixation Permeabilization kit  
696 (invitrogen) for granzymes A/B and Tbet according to manufacturer's protocol. For pSTAT5 and  
697 pSMAD2 intracellular staining, cells were fixed with 2% paraformaldehyde (EMS company) for 10  
698 minutes at room temperature and then permeabilized with ice-cold Methanol for 30 minutes before  
699 intracellular staining. Flow cytometry data was acquired on BD LSR Fortessa using DIVA software  
700 and analysed by FlowJo software.

#### 701 **Real time quantitative PCR**

702 RNA was isolated with RNeasy mini kit (Qiagen) and reverse transcribed with iScript cDNA  
703 synthesis kit (Bio-rad). Real-time RT-PCR was performed using LightCycler 480 SYBR Green  
704 Master (Roche) and different set of primer (table) on LightCycler 480 Real-Time PCR System



705 (Roche). Samples were normalized on GAPDH and analyzed according to the  $\Delta\Delta C_t$  method.

706 There are the sequences of the primers used for qRT-PCR :

707 GAPDH: FW : 5' CATGGCCTTCCGTGTTCTTA 3' RV : 5' TGTCATCATACTTGGCAGGT 3'

708 SMURF2: FW: 5' AACAGTTGCTTGGGAAGTCA3' RV:5' TGCTCAACACAGAAGGTATGGT3'

709 SKI: FW: 5' TGA CTCTGGACACAGCAGGA3' RV:5'GAGAGGACAGCGAGGACAAG3'

710 SKIL: FW: 5' AATAAAAAGCTGAACGGCATGGA3' RV:5'GGGTTTTCCATTGGCATGAAT3'

711 SMAD7: FW: 5'AAGTGTTTCAGGTGGCCGGATCTCAG3' RV:

712 5'ACAGCATCTGGACAGCCTGCAGTTG3'

713

## 714 **Bioinformatic Analyses**

715

716 All genomic data was analysed with R/Bioconductor packages, R version 3.6.3 (2020-02-  
717 29) [<https://cran.r-project.org/> ; <http://www.bioconductor.org/>].

718

## 719 **RNA-Seq**

720 Illumina sequencing was performed on RNA extracted from triplicates of each condition.

721 Standard Illumina bioinformatics analysis were used to generate fastq files, followed by

722 quality assessment [MultiQC v1.7 <https://multiqc.info/>], trimming and

723 demultiplexing. 'Rsubread' v1.34.6 was used for mapping to the hg38 genome and

724 creating a matrix of RNA-Seq counts. Next, a DGElist object was created with the 'edgeR'

725 package v3.26.7 [<https://doi.org/10.1093/bioinformatics/btp616>]. After normalization for

726 composition bias, genewise exact tests were computed for differences in the means

727 between groups, and differentially expressed genes (DEGs) were extracted based on an

728 FDR-adjusted p value < 0.05 and a minimum absolute fold change of 2. DEG' gene

729 symbols were tested for the overlap with published signatures of interest using the

730 'pathfindR' package [<https://doi.org/10.3389/fgene.2019.00858>]. Hypergeometric

731 Optimization of Motif EnRichment (HOMER v3.12)

732 [<https://doi.org/10.1016/j.molcel.2010.05.004>] was used to calculate motif enrichment on

733 the promoters of DEGs (up- and down-regulated genes separately), using default  
734 background settings.

735

### 736 **ChIP-Seq**

737 ChIP libraries were prepared (Active Motif) and sequenced (Illumina NextSeq500) using  
738 a standard workflow. Resulting 75-nt single-end reads were mapped to the mm10 genome  
739 using the BWA algorithm with default settings  
740 [<https://doi.org/10.1093/bioinformatics/btp324>]. Only reads that passed Illumina's purity  
741 filter, align with no more than 2 mismatches, and map uniquely to the genome were used  
742 in subsequent analyses. In addition, duplicate reads were removed. After normalization,  
743 the peak callers MACS/MACS2 [<https://doi.org/10.1186/gb-2008-9-9-r137>] were used to  
744 describe genomic regions with local enrichments in tag numbers relative to the Input data  
745 file (~ random background). Genomic ranges ('GenomicRanges' package) were used to  
746 perform genomic context annotations using the R packages 'annotatr' [DOI:  
747 10.1093/bioinformatics/btx183], 'ChIPSeeker' [ DOI: 10.1093/bioinformatics/btv145], and  
748 'ChipPeakAnno' [DOI: 10.1186/1471-2105-11-237]. Enriched heatmaps  
749 ('EnrichedHeatmap') [<https://doi.org/10.1186/s12864-018-4625-x>] were used to visualize  
750 average ChIP peak signals. HOMER v3.12 was used to calculate motif enrichment in the  
751 vicinity of ChIP peaks.

752 All sequencing data has been uploaded into the GEO repository, with Accession number:  
753 XXXXXXXXXXXX

754

### 755 **qPCR-based ChIP**

756

757 The PCR based ChIP was done using *ChIP It PBMC kit* from Active Motif catalog n° 53042  
758 and ChIP It qPCR analysis kit from Active Motif catalog n° 53029. Cells were collected  
759 from freshly harvested spleen, MLN and peripheral lymph nodes and then sorted using  
760 CD8+ isolation kit from Miltenyi Biotec catalog n° 130-104-075. Chromatin preparation and  
761 immunoprecipitation (IP) were performed according to manufacturer's protocol. IP were  
762 performed using anti-SMAD4 (EP618Y, Abcam); anti-H3K27ac (4729, Abcam); and rabbit  
763 IgG control (2729s, Cell Signaling). These are the sequences of the primers used por qPCR-

764 based ChIP : SKIL promoter (SMAD4 binding site) FW : 5' TATGACGGGCTAGCTTCACA 3' RV  
765 : 5' GAGACGGTAAGAGGTGGAGG 3' CD103 (SMAD4 binding site) FW :  
766 5'ggcagagcaaggatttgaac3' RV : 5'CAGAGGCTcagagaaaatagcc3' SMAD7 (SMAD4 binding site)  
767 FW : 5' AAACCCGATCTGTTGTTTGC 3' REV : 5' GGCCGTCTAGACACCCTGT 3'

### 768 **In vitro survival assay and IL-7 response**

769 CD8 T cells were obtained from freshly harvested mesenteric lymph nodes (MLN) from  
770 F5 transgenic WT, R2KO, SKO, and R2SKO mice. F5 naïve CD8 T cells were cultured in  
771 96 well plate ( $10^5$  cells/well) in complete RPMI media with or without recombinant IL-7 at  
772 10 ng/ml for different time points (0, 1, 3 and 5 days). For each time point, cells were  
773 washed and stained with LIVE/DEAD Fixable Dead Cell Stains kit (Life Technologies)  
774 according to manufacturer's protocol, and fluorescent Abs against CD8 and CD45. The  
775 frequency of surviving CD8 T cells was determined by flow cytometry. For pSTAT5  
776 staining, naïve CD8 T cells from the MLN of F5 transgenic WT, R2KO, SKO, and R2SKO  
777 mice were starved for 30 minutes at room temperature and then treated with mouse  
778 recombinant IL-7 at 10 ng/ml in RPMI 2% SVF for 30 minutes at 37°C. After 30 minutes  
779 of IL-7 stimulation, cells were immediately prepared for pSTAT5 staining (see Flow  
780 Cytometry section).

781

### 782 **In vitro CD8 T cells activation and differentiation**

783 Briefly, splenic naïve CD8 T cells of WT, R2KO, and SKO mice were isolated using  
784 Mojosort negative selection kit from Biolegend and activated for 4 days via anti-CD3/anti-  
785 CD28 antibodies (10  $\mu$ g/ml) plate bound (CD3, clone 145-2C11 catalog no 16-0031-86.;  
786 CD28, clone 37.51 catalog no. 16-0281-86). F5 naïve CD8 T cells were cultured in 96 well  
787 anti-CD3/anti-CD28 plate bound ( $10^5$  cells/well) in complete RPMI media with the  
788 presence of recombinant IL-7 at 10 ng/ml for all conditions. 4 days after, cells were  
789 washed and stained with LIVE/DEAD and Abs against CD45, CD8, Granzyme B and Tbet.

790

### 791 **In vitro TGF- $\beta$ treatment and suppression assay**

792 Splenic naïve CD8 T cells of WT, R2KO, and SKO mice were isolated using Miltenyi  
793 selection kit (Miltenyi Biotec) or Mojosort negative selection (Biolegend) and activated for  
794 4 days via anti-CD3/anti-CD28 antibodies (as described above) in the presence or

795 absence of human recombinant TGF- $\beta$ 1 (Miltenyi Biotec). The cells were cultured with  
796 TGF- $\beta$ 1 since the beginning. We note that we added IL-7 at 10 ng/ml for all our in vitro  
797 activation assays to maintain cells live. 4 days after, cells were washed and stained with  
798 LIVE/DEAD and Abs against CD45, CD8, Granzyme B and TBET. For p-SMAD2 staining,  
799 splenic naïve CD8 T cells from F5 transgenic WT, R2KO, SKO, and R2SKO mice were  
800 starved for 30 minutes at room temperature and then treated with human recombinant  
801 TGF- $\beta$ 1 at 10 ng/ml in RPMI 2% SVF for 20 minutes at 37°C. After 20 minutes of TGF- $\beta$ 1  
802 stimulation, cells were immediately prepared for pSMAD2 staining (see Flow Cytometry  
803 section).

804

### 805 **Statistics**

806 Unless mentioned otherwise two-tailed Student's t test was used to calculate statistical  
807 significance. P values <0.05 were considered significant. ns: nonsignificant; \*p < 0.05; \*\*p <  
808 0.01; p < 0.001; \*\*\*\*p < 0.0001. Statistics were performed using Prism Software.

809

### 810 **Author contributions**

811 R.I and S.M.S planned, supervised and conducted the experiments. H.H, C.B, and A.D  
812 performed the bio-informatic analysis. R.I, H.H, S.M.S, N.B, D.B and J.C.M discussed the  
813 data and provided conceptual input. S.M.S and J.C.M provide financial resources. R.I and  
814 S.M.S wrote the manuscript.

815

### 816 **Acknowledgments**

817 We thank the cytometry, histology, genomic and animal platforms of the CRCL and CLB for their  
818 help and assistance. In addition we thank Brigitte Manship, Anne-Marie Schmitt Verhulst and  
819 Gregoire Lauvau for discussing the paper.

### 820 **Fundings**

821 The "Association pour la Recherche sur le Cancer" (ARC) S.M. Soudja and R. Igalouzene. La ligue  
822 contre le cancer, J.C Marie.

823

824           **References**

- 825    1.    Spencer, S. P., Fragiadakis, G. K. & Sonnenburg, J. L. Pursuing Human-Relevant Gut Microbiota-  
826           Immune Interactions. *Immunity* (2019). doi:10.1016/j.immuni.2019.08.002
- 827    2.    Round, J. L. & Mazmanian, S. K. The gut microbiota shapes intestinal immune responses during  
828           health and disease. *Nature Reviews Immunology* (2009). doi:10.1038/nri2515
- 829    3.    Barnard, J. A., Warwick, G. J. & Gold, L. I. Localization of transforming growth factor  $\beta$  isoforms in  
830           the normal murine small intestine and colon. *Gastroenterology* (1993). doi:10.1016/0016-  
831           5085(93)90011-Z
- 832    4.    Gorelik, L. & Flavell, R. A. Abrogation of TGF $\beta$  signaling in T cells leads to spontaneous T cell  
833           differentiation and autoimmune disease. *Immunity* (2000). doi:10.1016/S1074-7613(00)80170-3
- 834    5.    Marie, J. C., Liggitt, D. & Rudensky, A. Y. Cellular Mechanisms of Fatal Early-Onset Autoimmunity  
835           in Mice with the T Cell-Specific Targeting of Transforming Growth Factor- $\beta$  Receptor. *Immunity* **25**,  
836           441–454 (2006).
- 837    6.    Li, M. O., Sanjabi, S. & Flavell, R. A. A. Transforming Growth Factor- $\beta$  Controls Development,  
838           Homeostasis, and Tolerance of T Cells by Regulatory T Cell-Dependent and -Independent  
839           Mechanisms. *Immunity* **25**, 455–471 (2006).
- 840    7.    Li, M. O. & Flavell, R. A. TGF- $\beta$ : A Master of All T Cell Trades. *Cell* **134**, 392–404 (2008).
- 841    8.    Tecalco-Cruz, A. C., Ríos-López, D. G., Vázquez-Victorio, G., Rosales-Alvarez, R. E. & Macías-  
842           Silva, M. Transcriptional cofactors Ski and SnoN are major regulators of the TGF- $\beta$ /Smad signaling  
843           pathway in health and disease. *Signal Transduction and Targeted Therapy* (2018).  
844           doi:10.1038/s41392-018-0015-8
- 845    9.    Nakao, A. *et al.* Identification of Smad7, a TGF $\beta$ -inducible antagonist of TGF- $\beta$  signalling. *Nature*  
846           (1997). doi:10.1038/39369
- 847    10.   Yan, X., Xiong, X. & Chen, Y. G. Feedback regulation of TGF- $\beta$  signaling. *Acta Biochimica et*  
848           *Biophysica Sinica* (2018). doi:10.1093/abbs/gmx129
- 849    11.   Massagué, J. & Wotton, D. Transcriptional control by the TGF-beta/Smad signaling system. *EMBO*  
850           *J.* **19**, 1745–54 (2000).
- 851    12.   He, W. *et al.* Hematopoiesis Controlled by Distinct TIF1 $\gamma$  and Smad4 Branches of the TGF $\beta$   
852           Pathway. *Cell* (2006). doi:10.1016/j.cell.2006.03.045
- 853    13.   Agricola, E., Randall, R. A., Gaarenstroom, T., Dupont, S. & Hill, C. S. Recruitment of TIF1 $\gamma$  to  
854           Chromatin via Its PHD Finger-Bromodomain Activates Its Ubiquitin Ligase and Transcriptional

- 855 Repressor Activities. *Mol. Cell* (2011). doi:10.1016/j.molcel.2011.05.020
- 856 14. Dupont, S. *et al.* FAM/USP9x, a Deubiquitinating Enzyme Essential for TGF $\beta$  Signaling, Controls  
857 Smad4 Monoubiquitination. *Cell* (2009). doi:10.1016/j.cell.2008.10.051
- 858 15. Dupont, S. *et al.* Germ-layer specification and control of cell growth by ectodermin, a Smad4  
859 ubiquitin ligase. *Cell* (2005). doi:10.1016/j.cell.2005.01.033
- 860 16. Monteleone, G., Caruso, R. & Pallone, F. Role of Smad7 in inflammatory bowel diseases. *World J*  
861 *Gastroenterol* **18**, 5664–5668 (2012).
- 862 17. Babyatsky, M. W., Rossiter, G. & Podolsky, D. K. Expression of transforming growth factors  $\alpha$  and  
863  $\beta$  in colonic mucosa in inflammatory bowel disease. *Gastroenterology* (1996).  
864 doi:10.1053/gast.1996.v110.pm8613031
- 865 18. Howe, J. R. *et al.* Mutations in the SMAD4/DPC4 gene in juvenile polyposis. *Science* **280**, 1086–  
866 1088 (1998).
- 867 19. Kim, B.-G. *et al.* Smad4 signalling in T cells is required for suppression of gastrointestinal cancer.  
868 *Nature* **441**, 1015–1019 (2006).
- 869 20. Inoshita, H. *et al.* Disruption of Smad4 Expression in T Cells Leads to IgA Nephropathy-Like  
870 Manifestations. *PLoS One* **8**, e78736 (2013).
- 871 21. Hahn, J. N., Falck, V. G. & Jirik, F. R. Smad4 deficiency in T cells leads to the Th17-associated  
872 development of premalignant gastroduodenal lesions in mice. *J. Clin. Invest.* **121**, 4030–42 (2011).
- 873 22. Gu, A. Di *et al.* A Critical Role for Transcription Factor Smad4 in T Cell Function that Is  
874 Independent of Transforming Growth Factor  $\beta$  Receptor Signaling. *Immunity* (2015).  
875 doi:10.1016/j.immuni.2014.12.019
- 876 23. Doisne, J. M. *et al.* iNKT cell development is orchestrated by different branches of TGF- $\beta$  signaling.  
877 *J. Exp. Med.* (2009). doi:10.1084/jem.20090127
- 878 24. Tanaka, S. *et al.* Trim33 mediates the proinflammatory function of Th17 cells. *J. Exp. Med.* (2018).  
879 doi:10.1084/jem.20170779
- 880 25. Zhang, S. *et al.* Reversing SKI–SMAD4-mediated suppression is essential for TH17 cell  
881 differentiation. *Nature* **551**, 105–109 (2017).
- 882 26. Yan, X., Liu, Z. & Chen, Y. Regulation of TGF- $\beta$  signaling by Smad7. *Acta Biochim. Biophys. Sin.*  
883 (*Shanghai*). **41**, 263–272 (2009).
- 884 27. Monteleone, G., Caruso, R. & Pallone, F. Role of Smad7 in inflammatory bowel diseases. *World J*  
885 *Gastroenterol* **18**, 5664–5668 (2012).

- 886 28. Gorelik, L. & Flavell, R. A. Transforming growth factor- $\beta$  in T-cell biology. *Nature Reviews*  
887 *Immunology* (2002). doi:10.1038/nri704
- 888 29. Bartholin, L. *et al.* Generation of mice with conditionally activated transforming growth factor beta  
889 signaling through the T $\beta$ RI/ALK5 receptor. *Genesis* **46**, 724–731 (2008).
- 890 30. Surh, C. D. & Sprent, J. Homeostasis of Naive and Memory T Cells. *Immunity* **29**, 848–862 (2008).
- 891 31. Sprent, J. & Surh, C. D. Normal T cell homeostasis: The conversion of naive cells into memory-  
892 phenotype cells. *Nature Immunology* **12**, 478–484 (2011).
- 893 32. Belarif, L. *et al.* IL-7 receptor influences anti-TNF responsiveness and T cell gut homing in  
894 inflammatory bowel disease. *J. Clin. Invest.* **129**, 1910–1925 (2019).
- 895 33. Lee, J. C. *et al.* Gene expression profiling of CD8+ T cells predicts prognosis in patients with Crohn  
896 disease and ulcerative colitis. *J. Clin. Invest.* **121**, 4170–4179 (2011).
- 897 34. El-Asady, R. *et al.* TGF- $\beta$ -dependent CD103 expression by CD8+ T cells promotes selective  
898 destruction of the host intestinal epithelium during graft-versus-host disease. *J. Exp. Med.* **201**,  
899 1647–1657 (2005).
- 900 35. Zhang, N. & Bevan, M. J. Transforming growth factor- $\beta$  signaling controls the formation and  
901 maintenance of gut-resident memory T cells by regulating migration and retention. *Immunity*  
902 (2013). doi:10.1016/j.immuni.2013.08.019
- 903 36. Smillie, C. S. *et al.* Intra- and Inter-cellular Rewiring of the Human Colon during Ulcerative Colitis.  
904 *Cell* (2019). doi:10.1016/j.cell.2019.06.029
- 905 37. Lee, J. C., Lyons, P., Parkes, M. & Smith, K. G. A CD8 T cell gene expression signature predicts  
906 disease behaviour in inflammatory bowel disease. *Gut* (2011). doi:10.1136/gut.2011.239301.122
- 907 38. Thomas, D. A. & Massagué, J. TGF- $\beta$  directly targets cytotoxic T cell functions during tumor  
908 evasion of immune surveillance. *Cancer Cell* (2005). doi:10.1016/j.ccr.2005.10.012
- 909 39. Davenport, M. P., Smith, N. L. & Rudd, B. D. Building a T cell compartment: how immune cell  
910 development shapes function. *Nat. Rev. Immunol.* (2020). doi:10.1038/s41577-020-0332-3
- 911 40. Smith, N. L. *et al.* Developmental Origin Governs CD8 + T Cell Fate Decisions during Infection.  
912 *Cell* (2018). doi:10.1016/j.cell.2018.05.029
- 913 41. Bergsbaken, T. & Bevan, M. J. Proinflammatory microenvironments within the intestine regulate  
914 the differentiation of tissue-resident CD8+ T cells responding to infection. *Nat. Immunol.* **16**, 406–  
915 414 (2015).
- 916 42. Cortez, V. S. *et al.* SMAD4 impedes the conversion of NK cells into ILC1-like cells by curtailing

917 non-canonical TGF- $\beta$  signaling. *Nat. Immunol.* **18**, 995–1003 (2017).

918

919



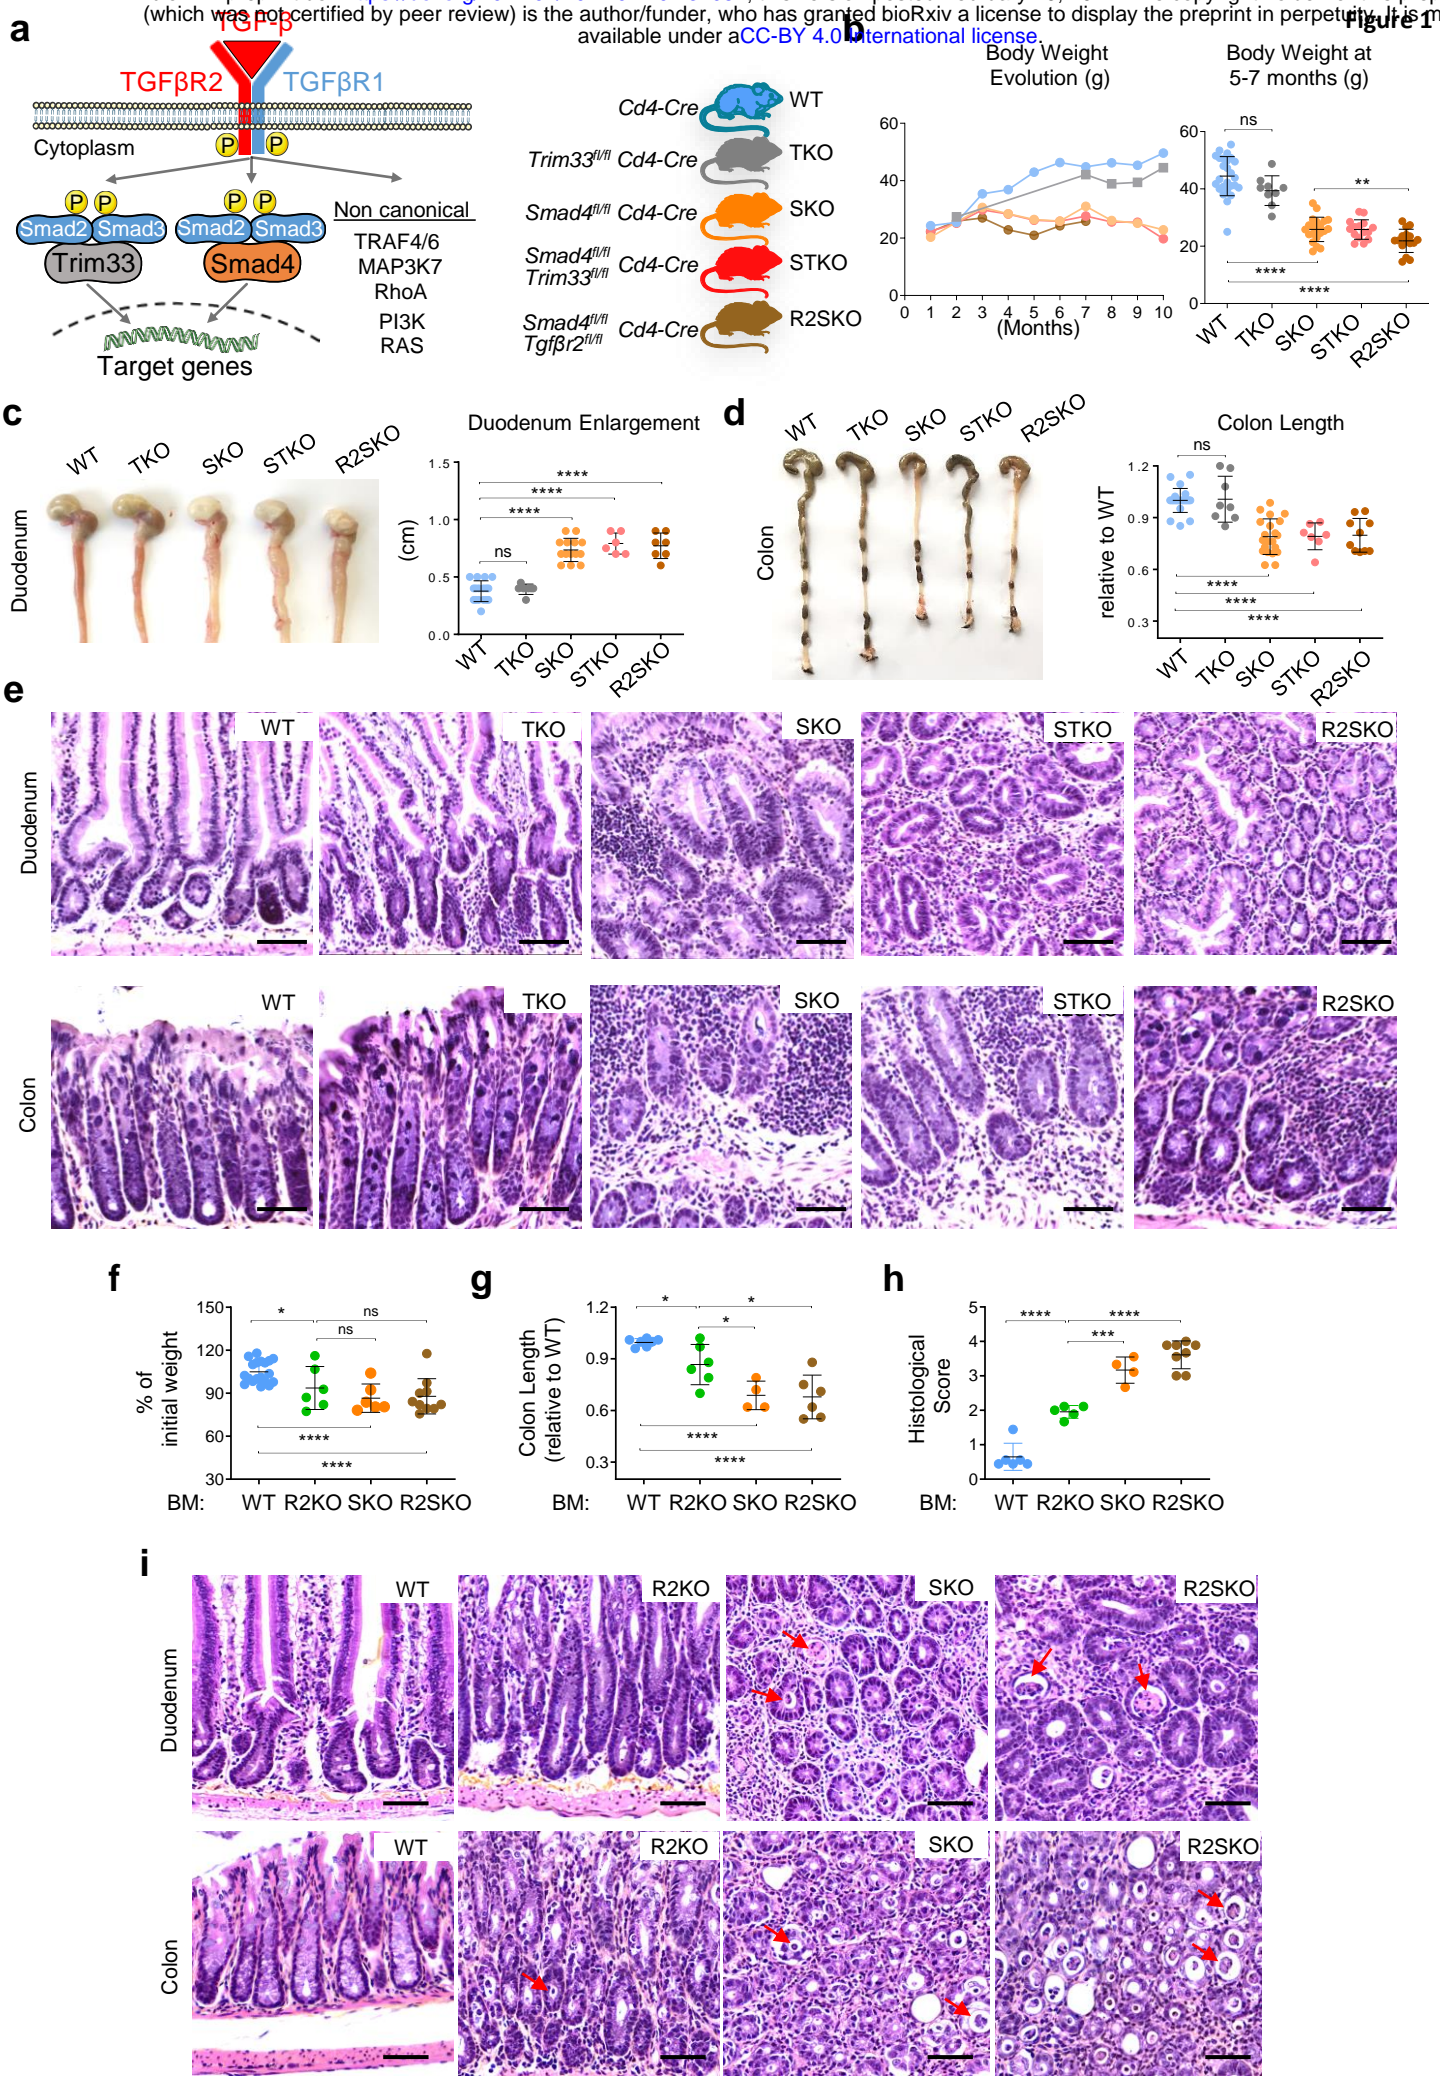

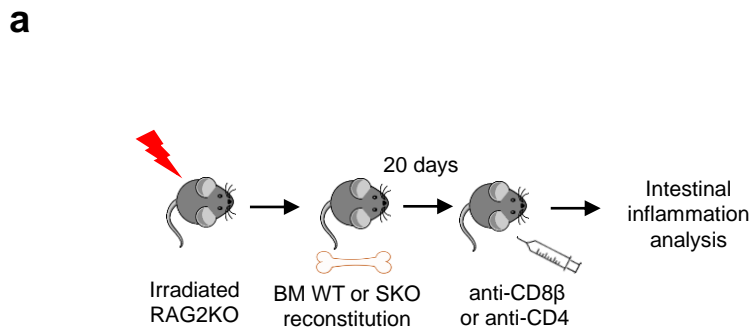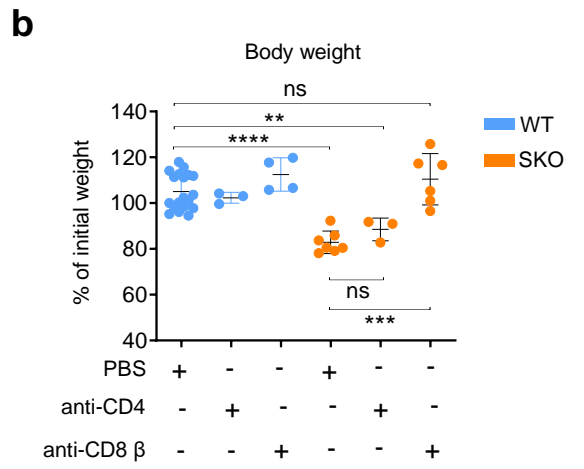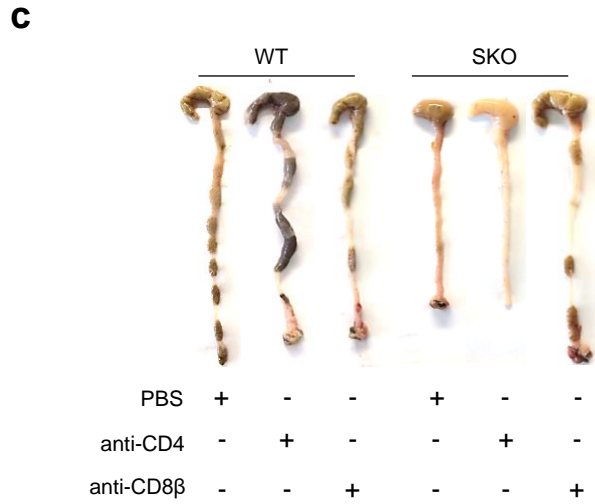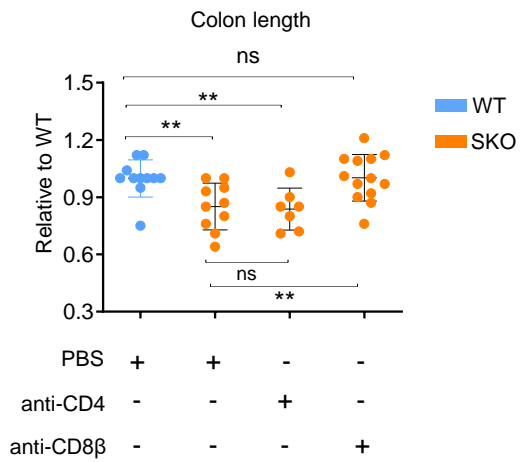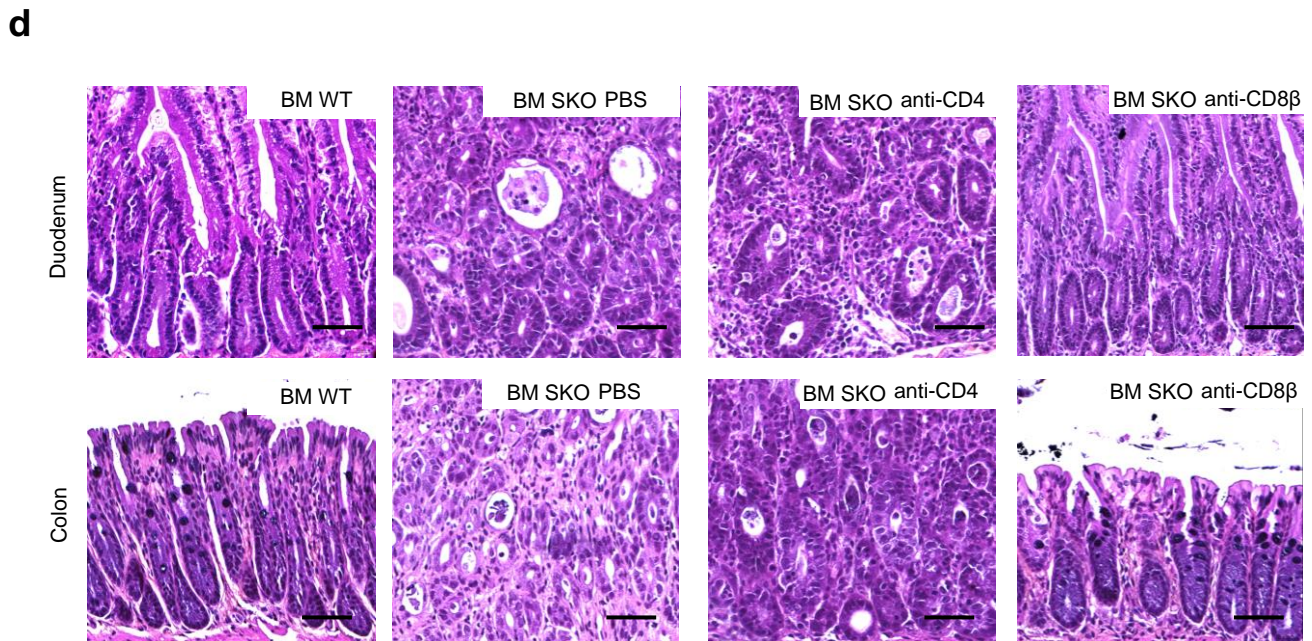

**a**

Gated on CD45+ cells

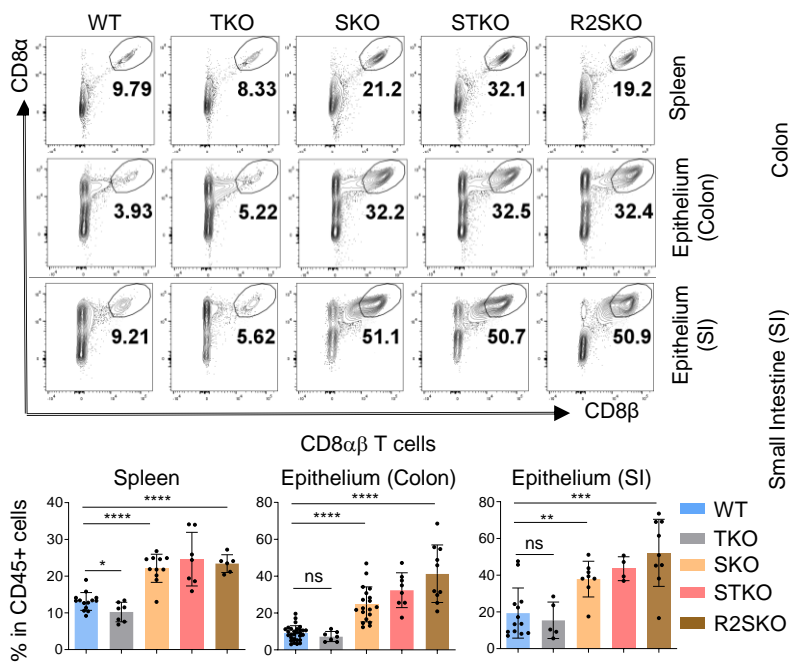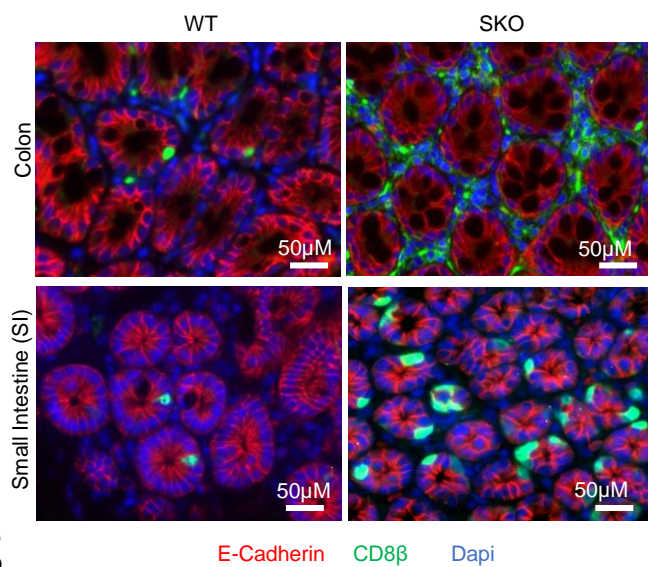

**c**

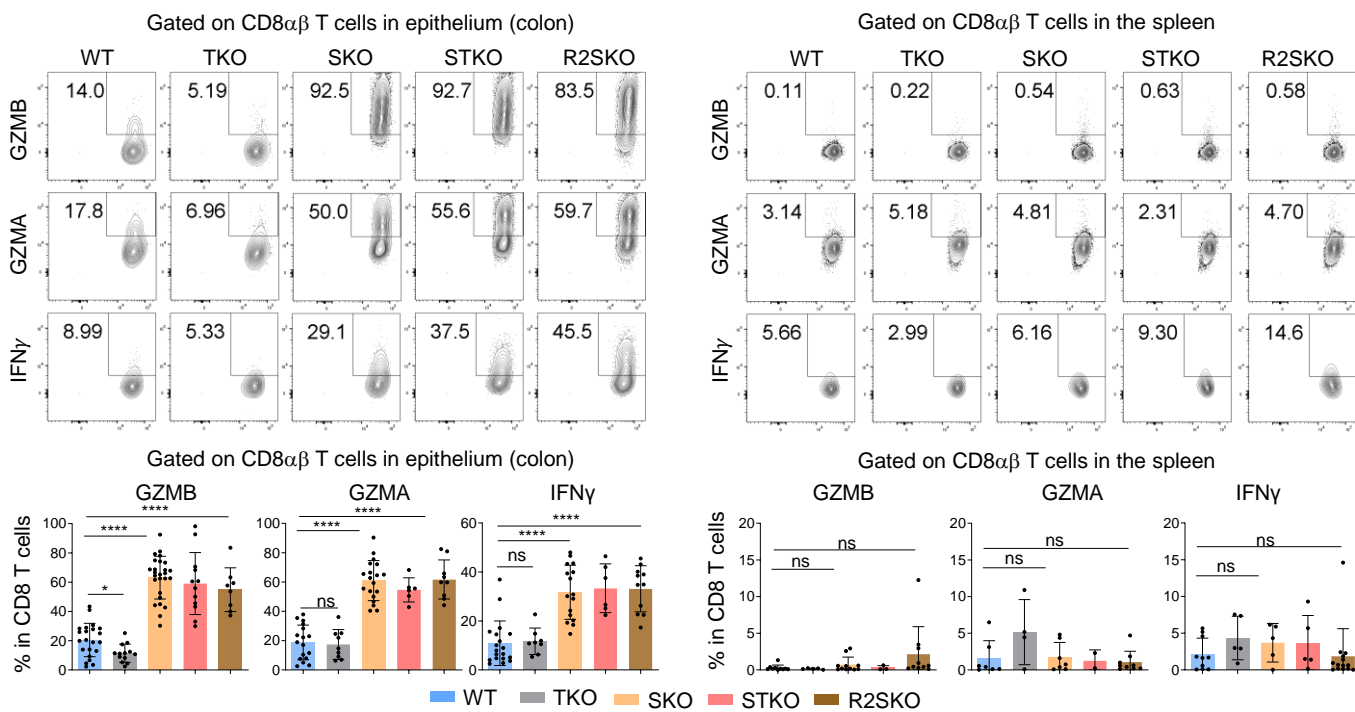

**d**

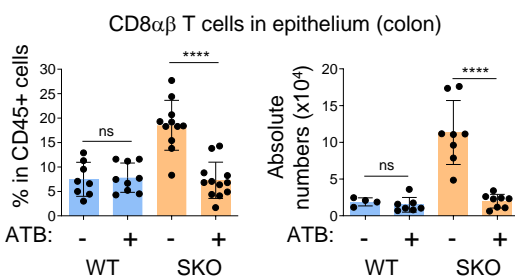

**e**

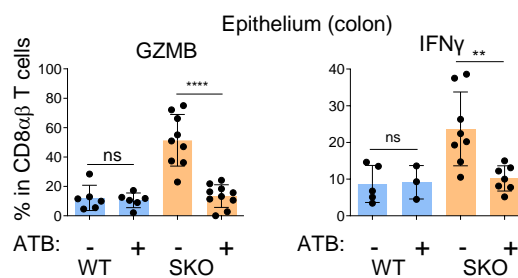

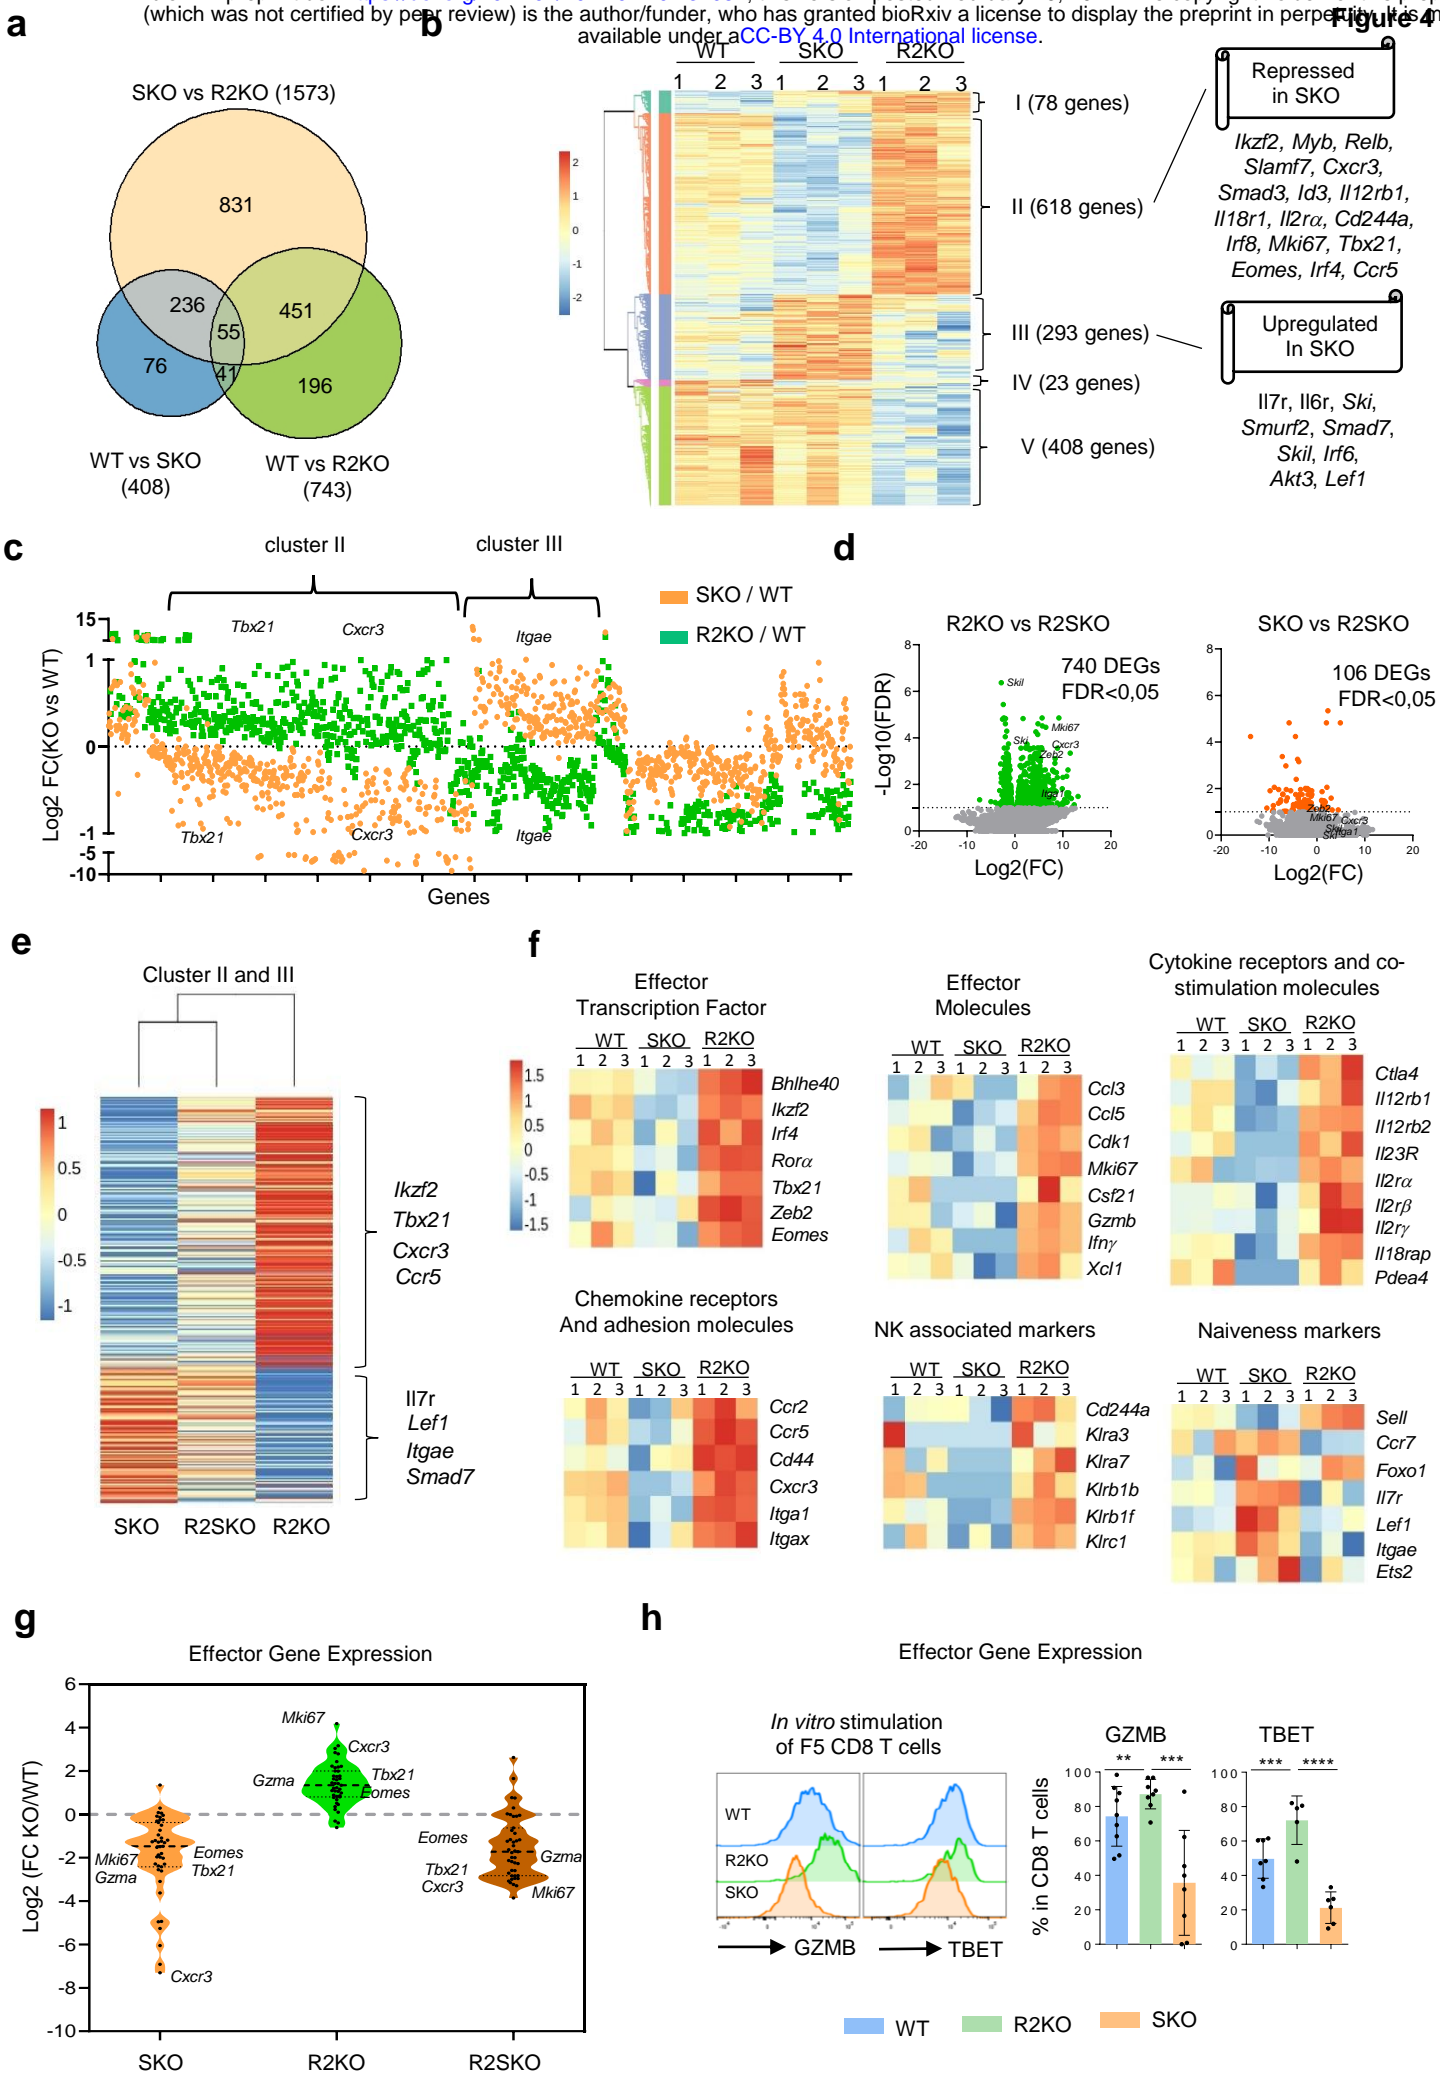

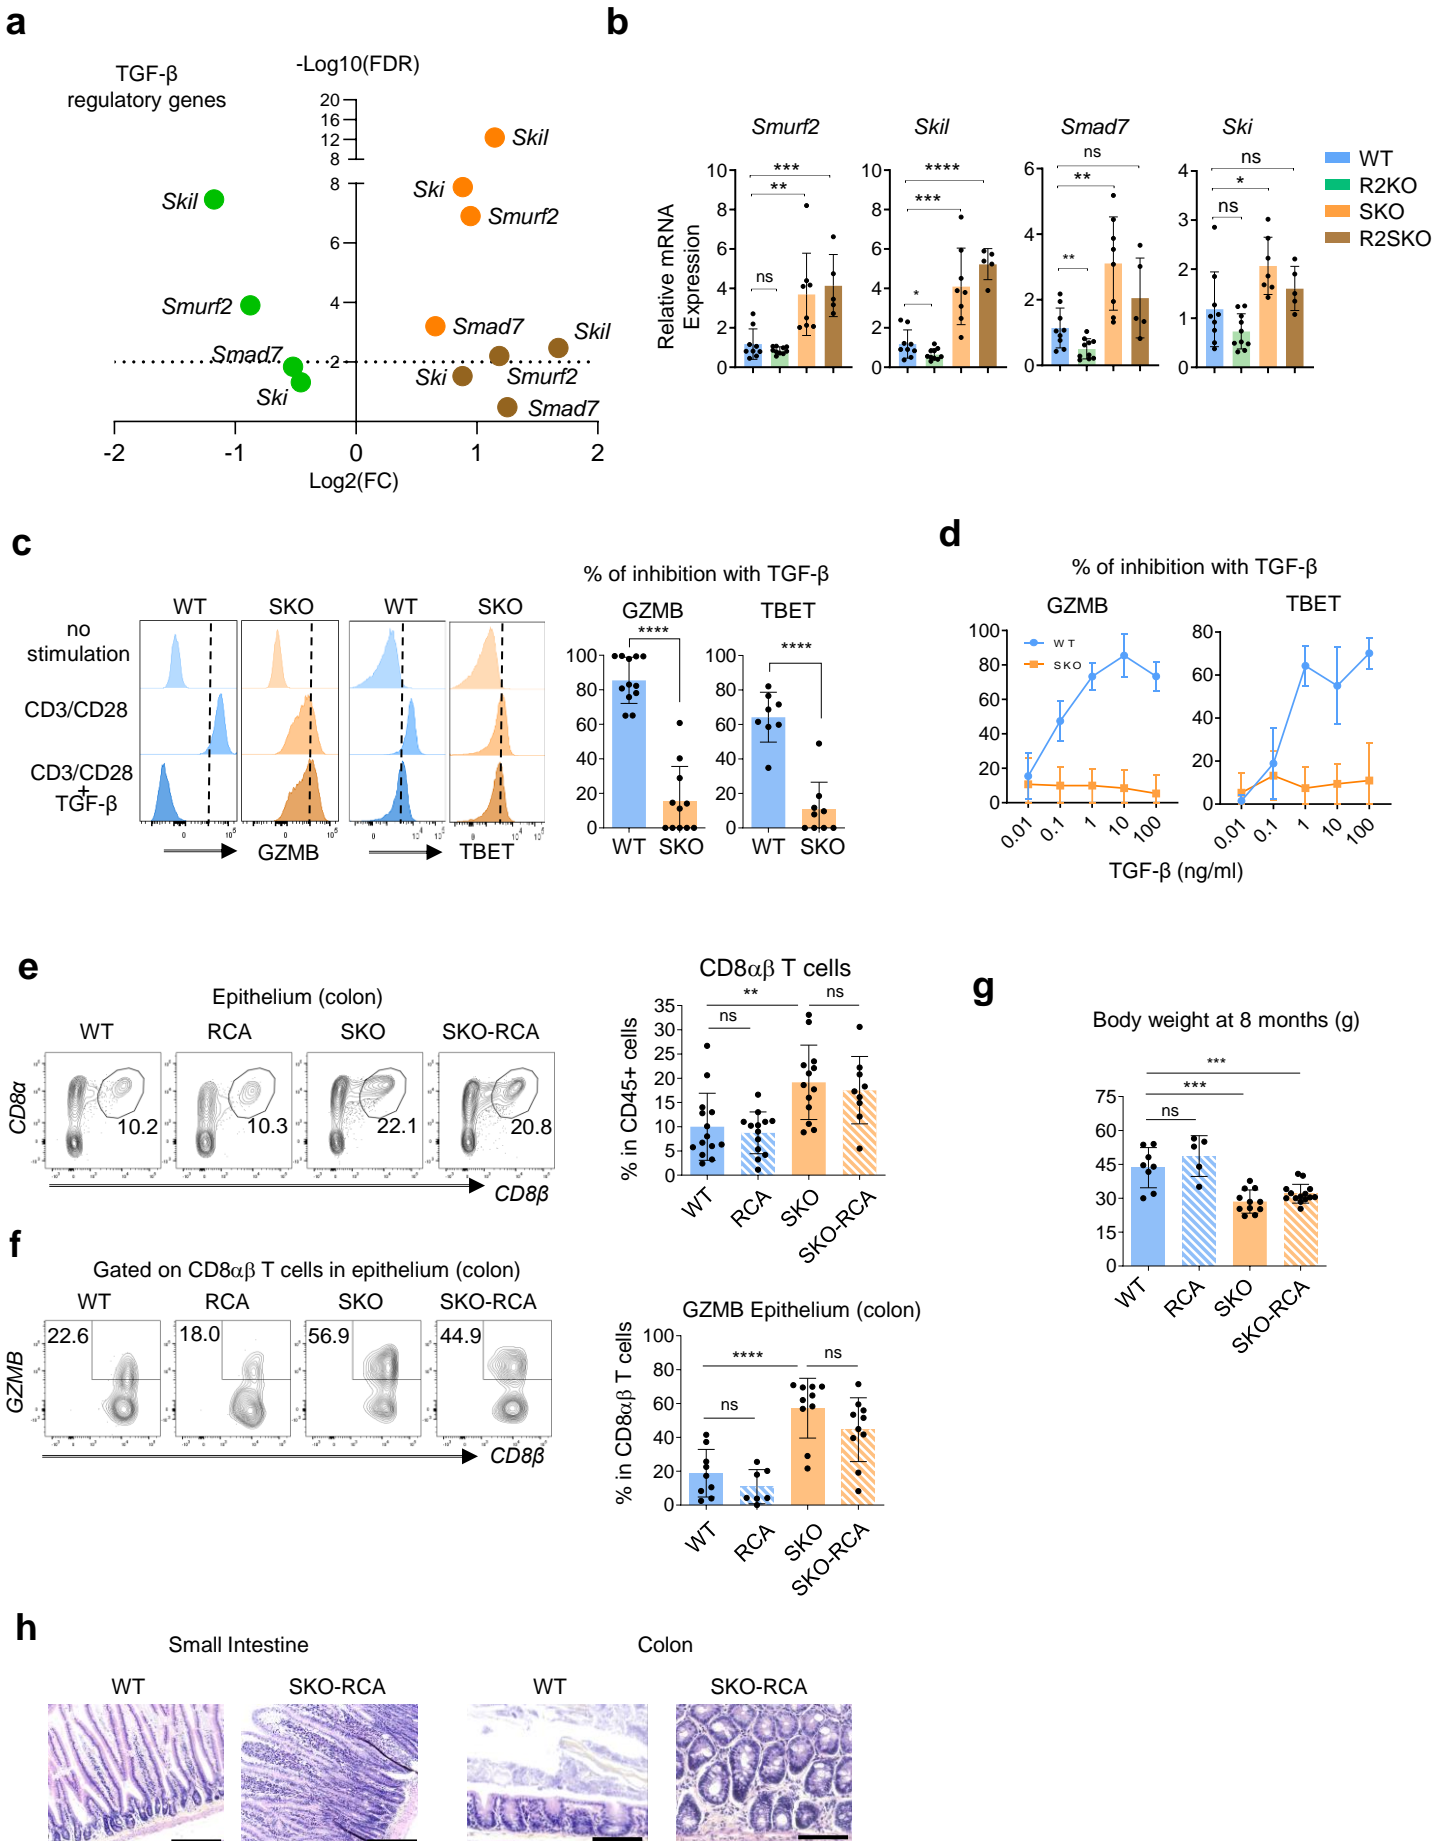

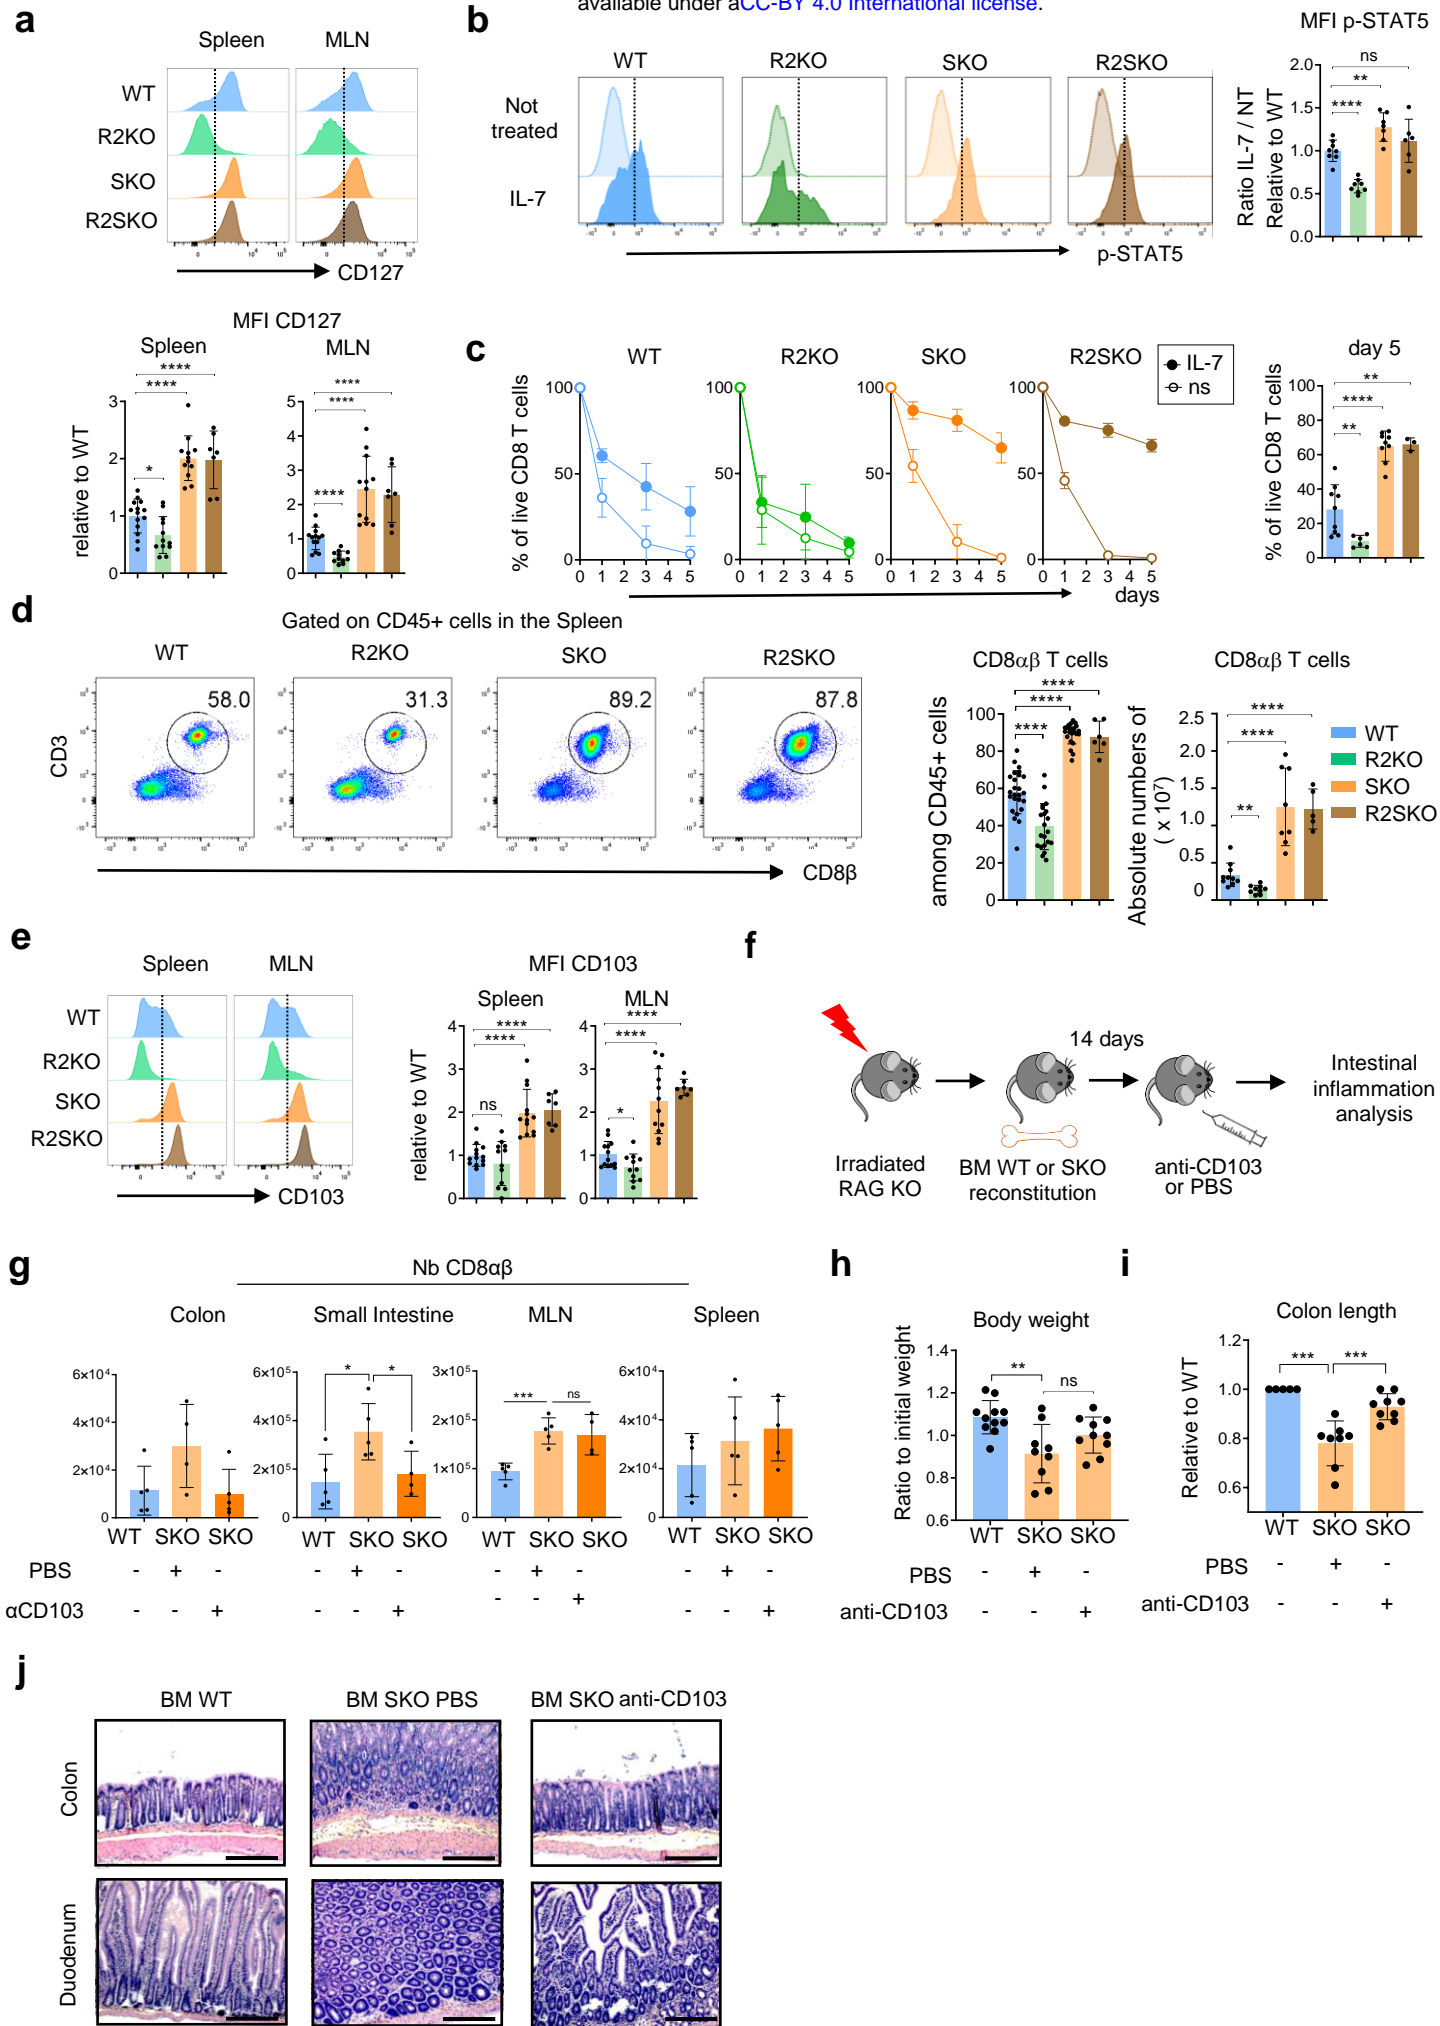

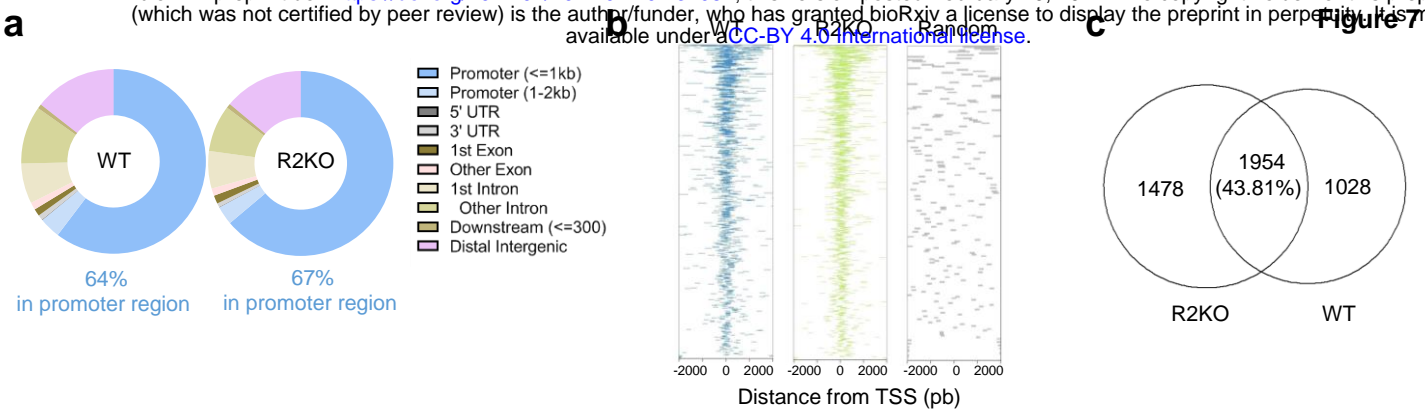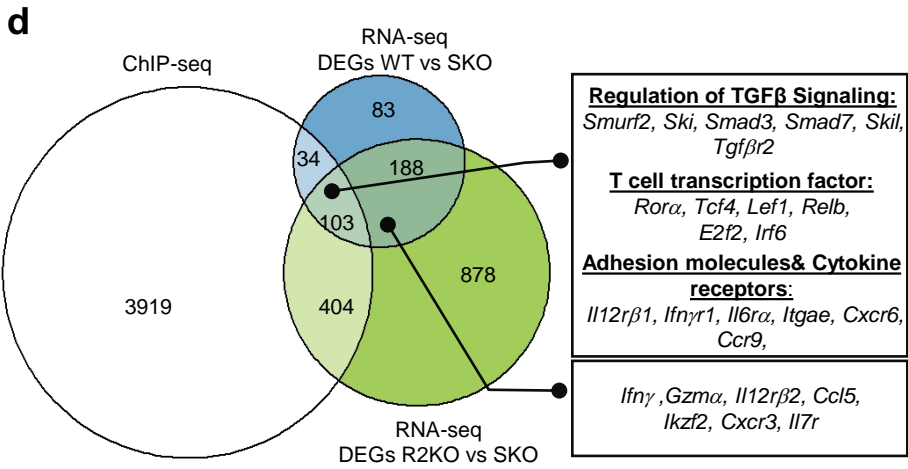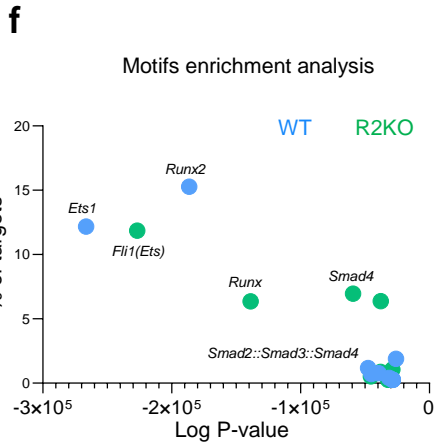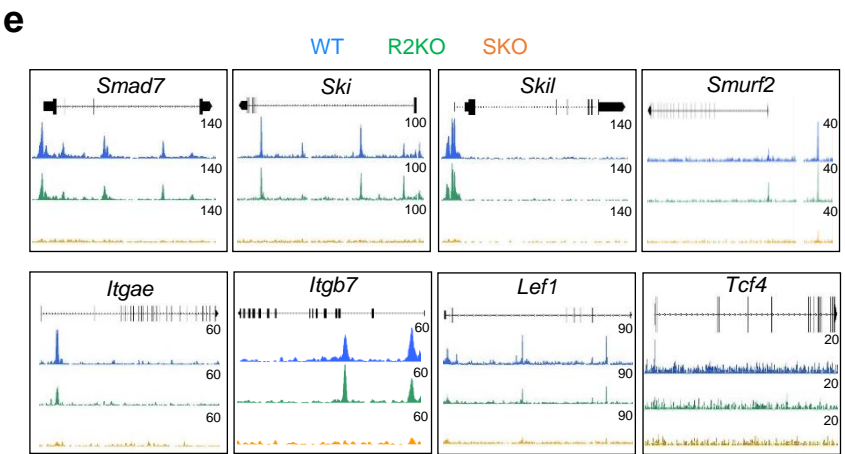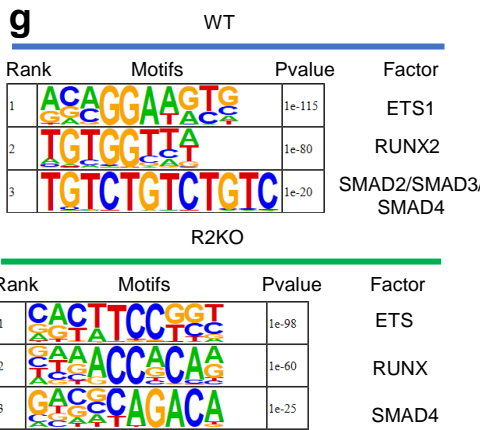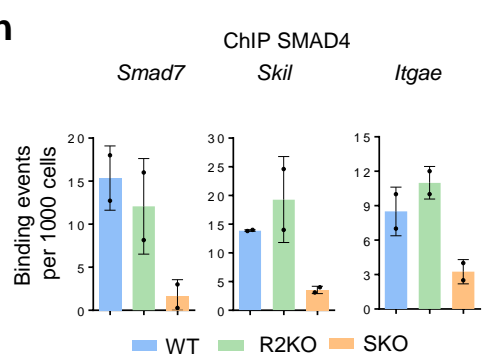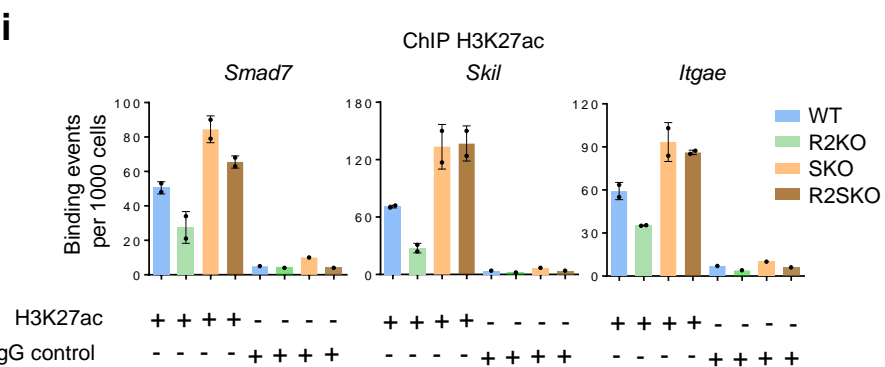

**a**

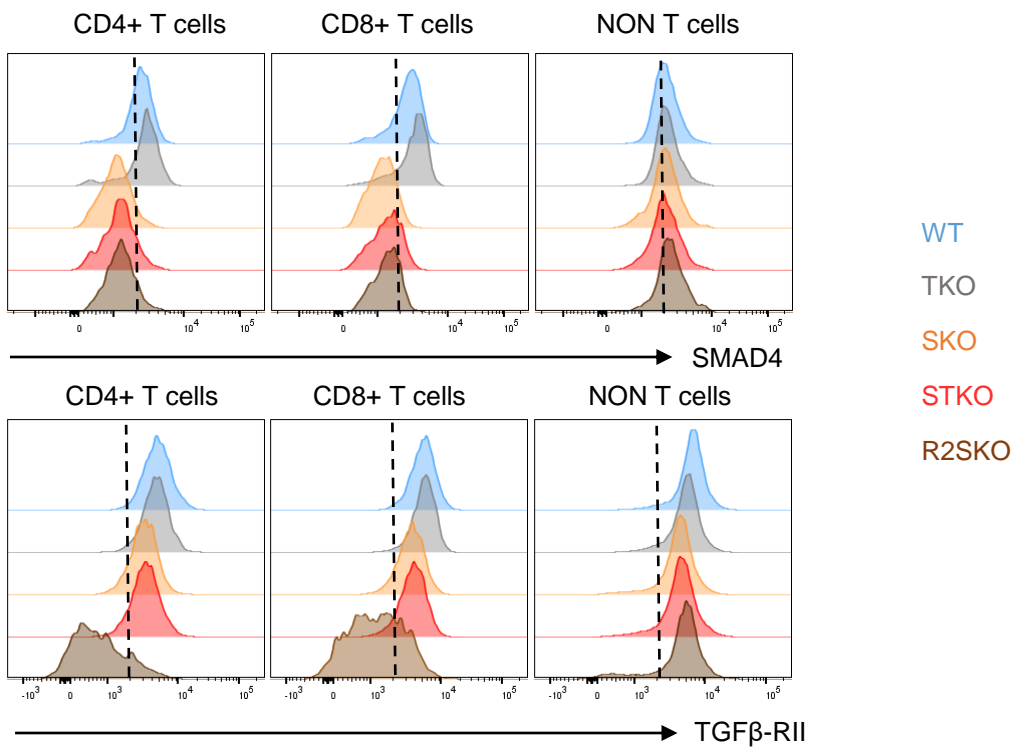

**b**

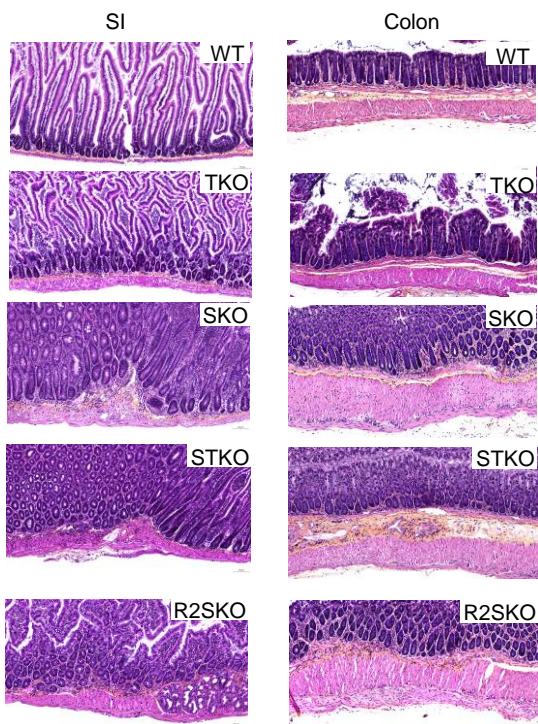

**c**

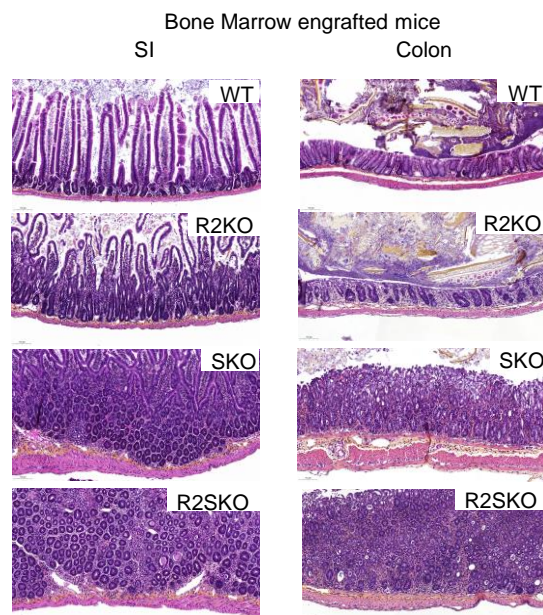



**a**

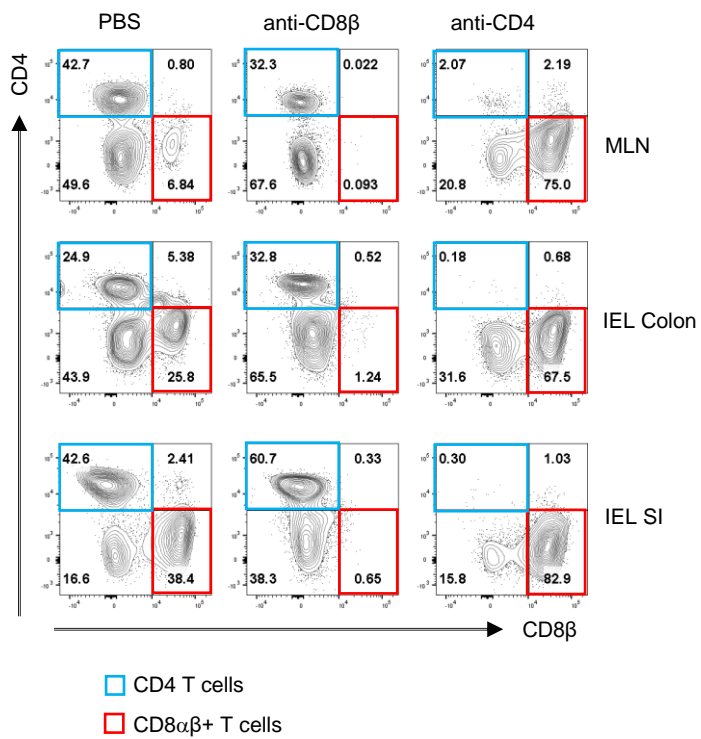

**b**

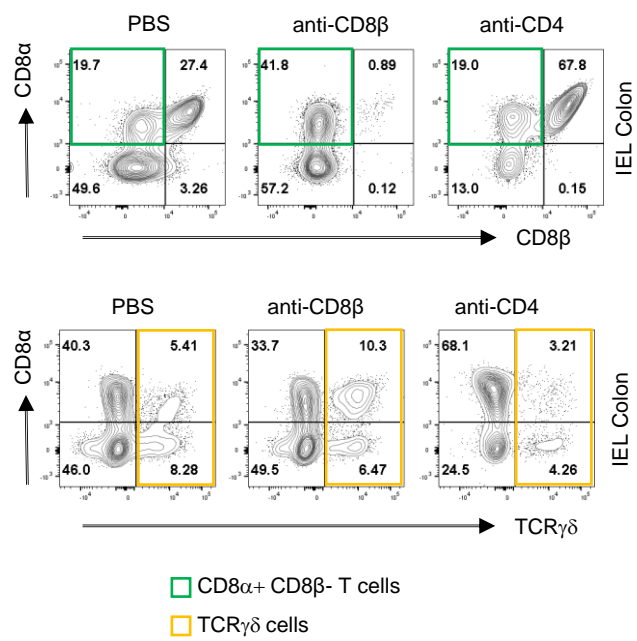

**c**

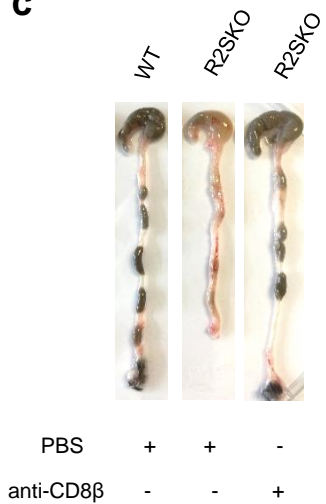

**d**

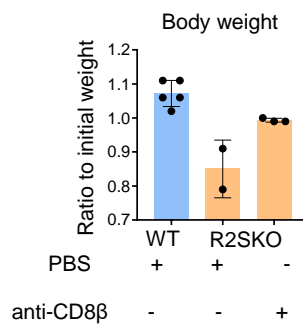

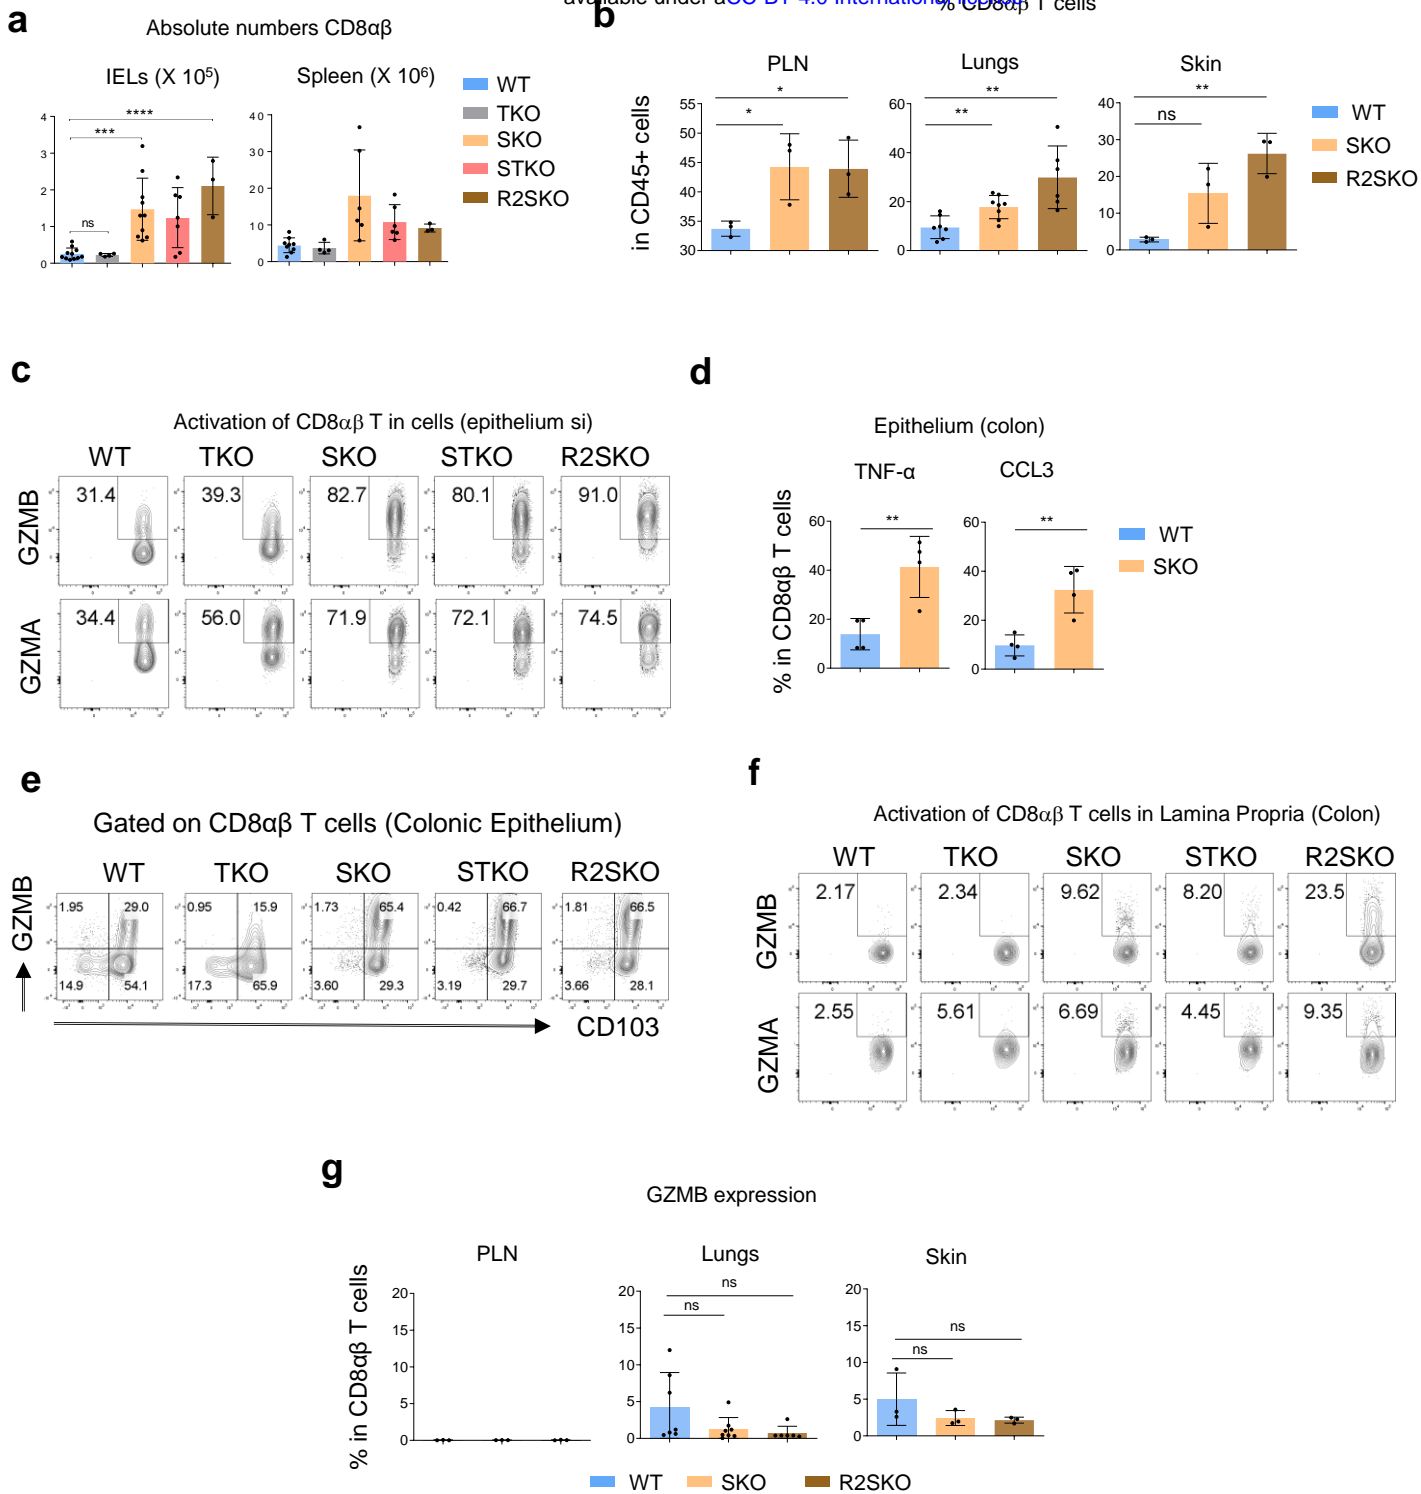

**a**

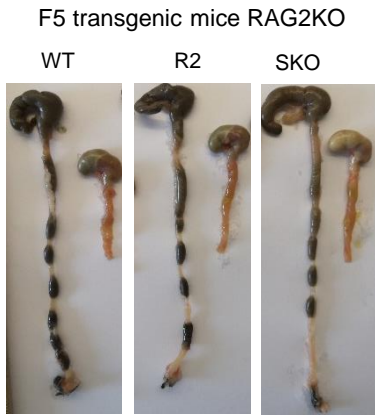

**b**

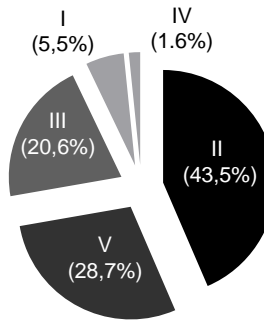

**c**

Gene Set Enrichment Analysis (GSEA)

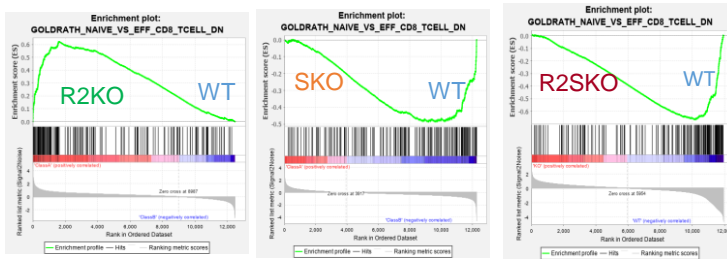

**d**

List of genes used for violin plot

*Ccl3 Ccl4 Ccl5 Ccr2 Ccr4 Ccr5 Cd244a Cxcr3 FasL Gzma Gzmb Id2 Ikbz2  
 Il12rb1 Il12rb2 Il2ra Il2rb Il2rg Irf4 Irf8 Itgax Klra2 Klra7 Klrb1b Klrb1f Klrc1  
 Klri2 Klrk1 Prdm1 Prf1 Rora Tbx21 Xcl1 Zeb2 Mki67 Ctla4 Cdk1 Cd44  
 Bhlhe40 Itga1 Il18rap Pde4a Eomes*

**a**

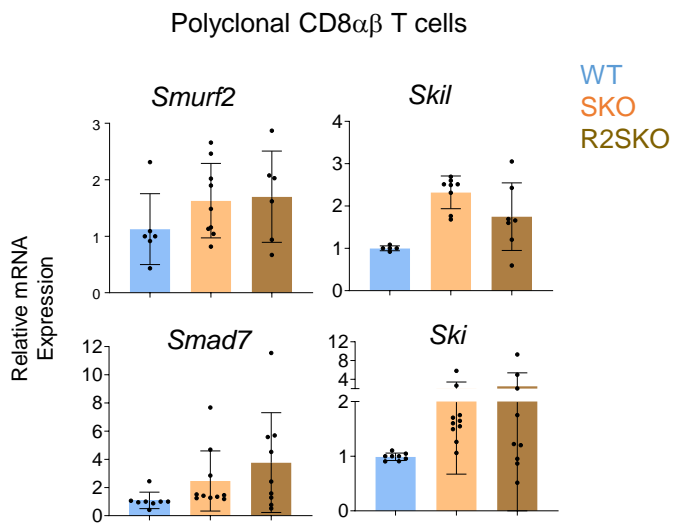

**a**

Polyclonal CD8 T cells

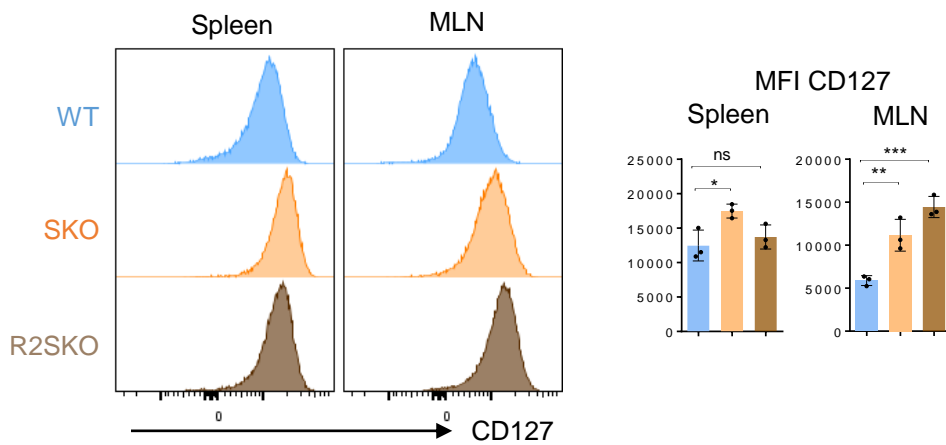

**b**

Polyclonal CD8 T cells

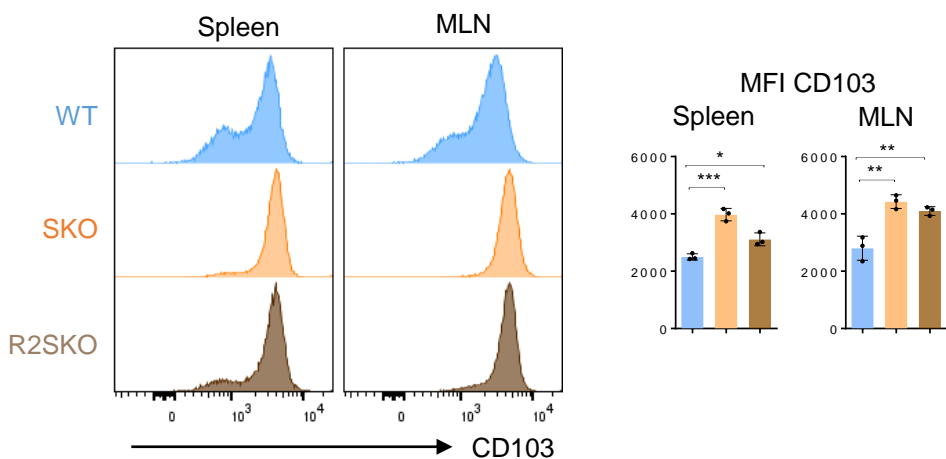

**c**

CD8 $\alpha\beta$  T cells

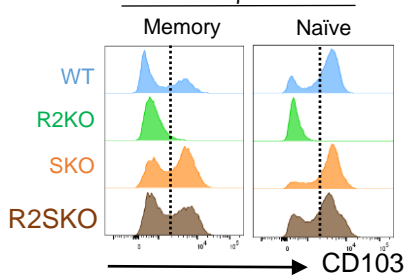

**d**

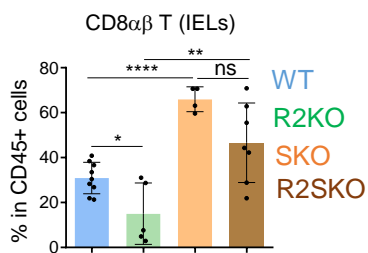

**e**

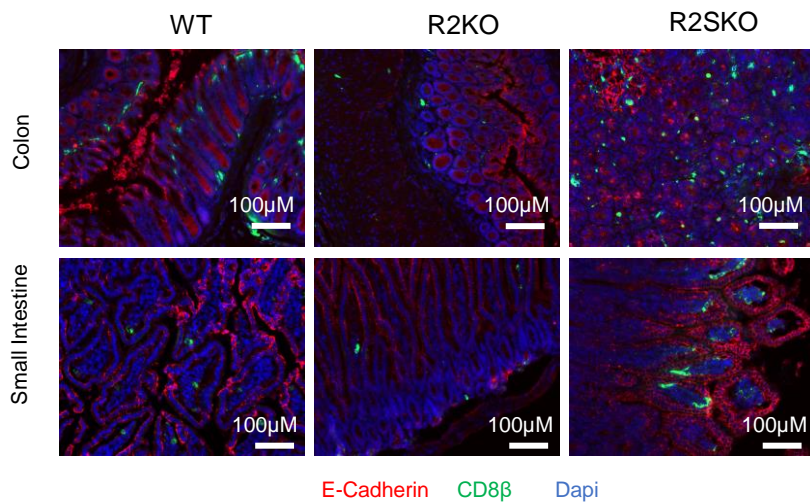

E-Cadherin CD8 $\beta$  Dapi

**a**

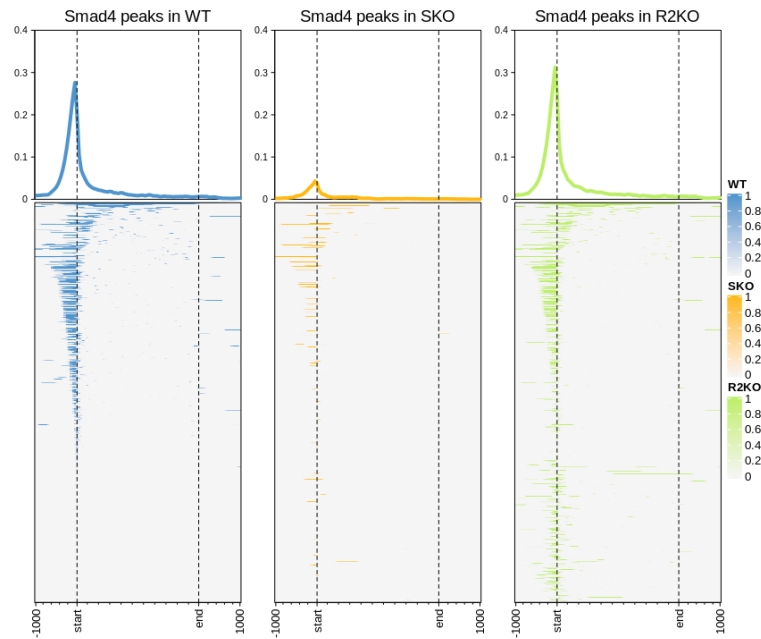

**b**

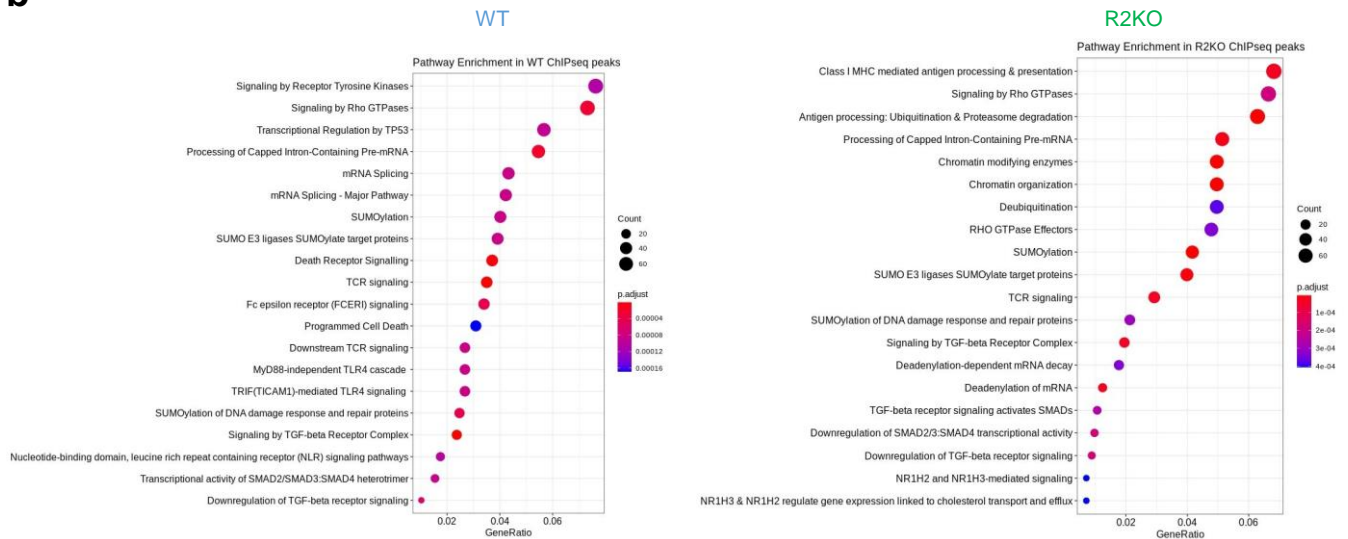

**c**

List of the 103 genes

*Sgk1 Ly6e Kcnc1 Sfr1 Arrb2 Atp8b4 F2r Tnk2 Fam3c Il12rb1 Ly6c2 Cxcr6 Ift80 Prkcz Ccr9 Snord110 Golm1 Nt5e Arhgef12 Tgfb1i1 Smurf2 Smpd5 Pde3b P2rx7 St8sia6 Pdlim1 Ski Baiap3 Ifngr1 Gm8369 Ly6i Rgs10 Celsr1 Smad3 Il6ra Slc6a19 Rasal1 Fmn13 Enc1 Lpxn Snord32a Vmp1 Snord34 Slc16a5 Atxn1 Snord49b Btg1 Zfp605 Rab3ip Dzip1 Fyn Gimap7 Camsap2 Kctd12 Dnajb1 Cd163l1 Dtx1 Myh9 Dennd4a Ttc28 Susd3 Xdh Snord57 Lrig1 Relb Ly6a Eef2k Fam102a Skil Rora Tcf4 Slfn5 Itgae Podnl1 Lef1 Actb Wnt5b Tfrc Dad1 1700017B05Rik Smad7 Gng2 Erdr1 Arl4c Tnfrsf14 Cobll1 Irf6 Oasl2 Coro2a Tmem64 Tle3 Abi3 Cd3d Pde4a Marc1 Lpin2 Spsb1 Gpr68 Emid1 Tgfb2 E2f2 Cotl1 Gdpd*
